# Supplementary material for: Synthesis, structure and bonding nature of heavy dipnictene radical anions
Source: Royal Society of Chemistry journal article supplement (doi:10.1039/d1sc04230k), 2021-01-01
Supplement: d1sc04230k1.pdf [file d1sc04230k1.pdf]

## **Synthesis, Structure and Bonding Nature of Heavy Dipnictene Radical Anions**

Hanns M. Weinert,<sup>†</sup> Christoph Wölper,<sup>†</sup> Julia Haak,<sup>†‡</sup> George E. Cutsail III,<sup>†‡</sup> and Stephan Schulz<sup>\*†#</sup>

<sup>†</sup>Institute for Inorganic Chemistry and <sup>#</sup>Center for Nanointegration Duisburg-Essen (Cenide), University of Duisburg-Essen, Universitätsstraße 5–7, 45117 Essen (Germany)

<sup>‡</sup>Max Planck Institute for Chemical Energy Conversion (CEC), Stiftstraße 34–36, 45470 Mülheim a.d. Ruhr (Germany).

## Content

**Fig. S1.**  $^1\text{H}$  NMR (300 MHz thf- $d_8$ , 25 °C) of  $(\text{DME})[\text{K}(\text{B}-18\text{-C}-6)][\text{L}(\text{Me}_2\text{N})\text{GaSb}]_2$  **3** for Evans' method.

**Fig. S2.**  $^1\text{H}$  NMR (300 MHz thf- $d_8$ , 25 °C) of  $(\text{DME})[\text{K}(\text{B}-18\text{-C}-6)][\text{L}(\text{Et}_2\text{N})\text{GaBi}]_2$  **4** for Evans' method.

**Fig. S3.** ATR-IR spectrum of  $(\text{DME})[\text{K}(\text{B}-18\text{-C}-6)][\text{L}(\text{Me}_2\text{N})\text{GaSb}]_2$  **3**.

**Fig. S4.** ATR-IR spectrum of  $(\text{DME})[\text{K}(\text{B}-18\text{-C}-6)][\text{L}(\text{Et}_2\text{N})\text{GaBi}]_2$  **4**.

**Fig. S5.** Reduction reaction of 10 mg of the dipnictenes **1**, **2** (left side) to **3**, **4** (right side) with 1 eq. of  $\text{KC}_8$  in DME. The pictures were taken shortly after the preparation.

**Fig. S6.** UV-Vis spectrum of **1** in benzene solution.

**Fig. S7.** UV-Vis spectrum of **2** in benzene solution.

**Fig. S8.** UV-Vis spectrum of **3** in THF solution.

**Fig. S9.** UV-Vis spectrum of **4** in THF solution.

**Fig. S10.**  $^1\text{H}$  NMR spectrum (300 MHz, thf- $d_8$ , 25 °C) of the reaction of  $[\text{L}(\text{Me}_2\text{N})\text{GaSb}]_2$  **1** and  $[\text{K} \text{Cryp-}2,2,2]^+[\text{C}_{10}\text{H}_8]^-$  at ambient temperature. Bottom: before the addition of the reducing agent.

**Fig. S11.**  $^1\text{H}$  NMR spectrum (300 MHz,  $\text{C}_6\text{D}_6$ ) of the reaction of  $[\text{L}(\text{Et}_2\text{N})\text{GaBi}]_2$  **2** and  $[\text{K} \text{Cryp-}2,2,2]^+[\text{C}_{10}\text{H}_8]^-$  at ambient temperature in  $\text{C}_6\text{D}_6$ . Bottom: before the addition of the reducing agent.

**Fig. S12.**  $^1\text{H}$  NMR (300 MHz thf- $d_8$ , 25 °C) of a freshly prepared  $[\text{K}(\text{B}-18\text{-C}-6)][\text{L}(\text{Et}_2\text{N})\text{GaBi}]_2$  **4** solution for Evans' method.

**Fig. S13.**  $^1\text{H}$  NMR (300 MHz thf- $d_8$ , 25 °C) of  $[\text{K}(\text{B}-18\text{-C}-6)][\text{L}(\text{Et}_2\text{N})\text{GaBi}]_2$  **4** for Evans' method. Bottom, measured after 20 min. Top, after 5 h.

**Fig. S14.** Cyclic voltammograms of  $[\text{L}(\text{Me}_2\text{N})\text{GaSb}]_2$  **1** in THF solution (1 mM) at 45 °C containing  $[\text{n-Bu}_4\text{N}][\text{PF}_6]$  (100 mM) as electrolyte at varying scan rate showing the reversible reduction event.

**Fig. S15.** Cyclic voltammograms of  $[\text{L}(\text{Et}_2\text{N})\text{GaBi}]_2$  **2** in THF solution (1 mM) at 45 °C containing  $[\text{n-Bu}_4\text{N}][\text{PF}_6]$  (100 mM) as electrolyte at varying scan rate showing the reversible reduction event.

**Fig. S16-S17.** EPR studies of radical anions **4**.

**Fig. S18.** Biorthogonalized SOMO of  $(\text{DME})[\text{K}(\text{B}-18\text{-C}-6)][\text{L}(\text{Me}_2\text{N})\text{GaSb}]_2$  **3** (left) and  $(\text{DME})[\text{K}(\text{B}-18\text{-C}-6)][\text{L}(\text{Et}_2\text{N})\text{GaBi}]_2$  **4** (right), isovalue 0.03.

**Fig. S19.** ELF distribution in  $[\text{L}(\text{Me}_2\text{N})\text{GaSb}]_2$  **1**,  $(\text{DME})[\text{K}(\text{B}-18\text{-C}-6)][\text{L}(\text{Me}_2\text{N})\text{GaSb}]_2$  **3** and  $[\text{L}(\text{Et}_2\text{N})\text{GaBi}]_2$  **2**,  $(\text{DME})[\text{K}(\text{B}-18\text{-C}-6)][\text{L}(\text{Et}_2\text{N})\text{GaBi}]_2$  **4** in the M–E–E(-M) plane, left to right. V(M,E), V(E), and V(E,E) basins are indicated by green, yellow, and red arrows, respectively.

**Fig. S20-23.** UV-Vis spectrum of **1-4** (black), calculated transition maxima (red) and depiction of the electron difference density of the ground and excited state for the dominant transitions.

**Table S1.** Crystallographic data of  $(\text{DME})[\text{K}(\text{B}-18\text{-C}-6)][\text{L}(\text{Me}_2\text{N})\text{GaSb}]_2$  (**3**) and  $(\text{DME})[\text{K}(\text{B}-18\text{-C}-6)][\text{L}(\text{Et}_2\text{N})\text{GaBi}]_2$  (**4**).

**Table S2-5.** Calculated X–Y bond lengths ( $r$ , Å) (exp.), X and Y NPA (AIM) atomic charges ( $q$ ,  $|e|$ ), Wiberg bond indices (WBI), occupation numbers (ON,  $|e|$ ) of the  $\sigma_{XY}$  bonds according to NBO analysis, ELF localization and Delocalization Index, populations of V(X,Y) ELF basins ( $\underline{N}$  [ $V(X,Y)$ ],  $e$ ), and AIM parameters at the bond critical points ( $\rho(r_b)$ ,  $\Delta\rho(r_b)$ ,  $|V(r_b)|/G(r_b)$ ,  $H(r_b)$ , atomic units) for the  $\text{Ga}_2\text{Pn}_2$  skeleton of  $[\text{L}(\text{NMe}_2)\text{GaSb}]_2$  (**1**),  $[\text{L}(\text{Et}_2\text{N})\text{GaBi}]_2$  (**2**),  $(\text{DME})[\text{K}(\text{B}-18\text{-C}-6)][\text{L}(\text{Me}_2\text{N})\text{GaSb}]_2$  (**3**) and  $(\text{DME})[\text{K}(\text{B}-18\text{-C}-6)][\text{L}(\text{Et}_2\text{N})\text{GaBi}]_2$  (**4**).

**Table S6.** Overview of most intense calculated UV-Vis transition by TD-DFT for **1-4**.

**Table S7-10.** Cartesian coordinates of  $[\text{L}(\text{Me}_2\text{N})\text{GaSb}]_2$  (**1**),  $[\text{L}(\text{Et}_2\text{N})\text{GaBi}]_2$  (**2**) and  $[\text{L}(\text{Me}_2\text{N})\text{GaSb}]_2^-$  (**3**) [Å] and  $[\text{L}(\text{Et}_2\text{N})\text{GaBi}]_2^-$  (**4**) for the optimized geometry.

## Experimental Details

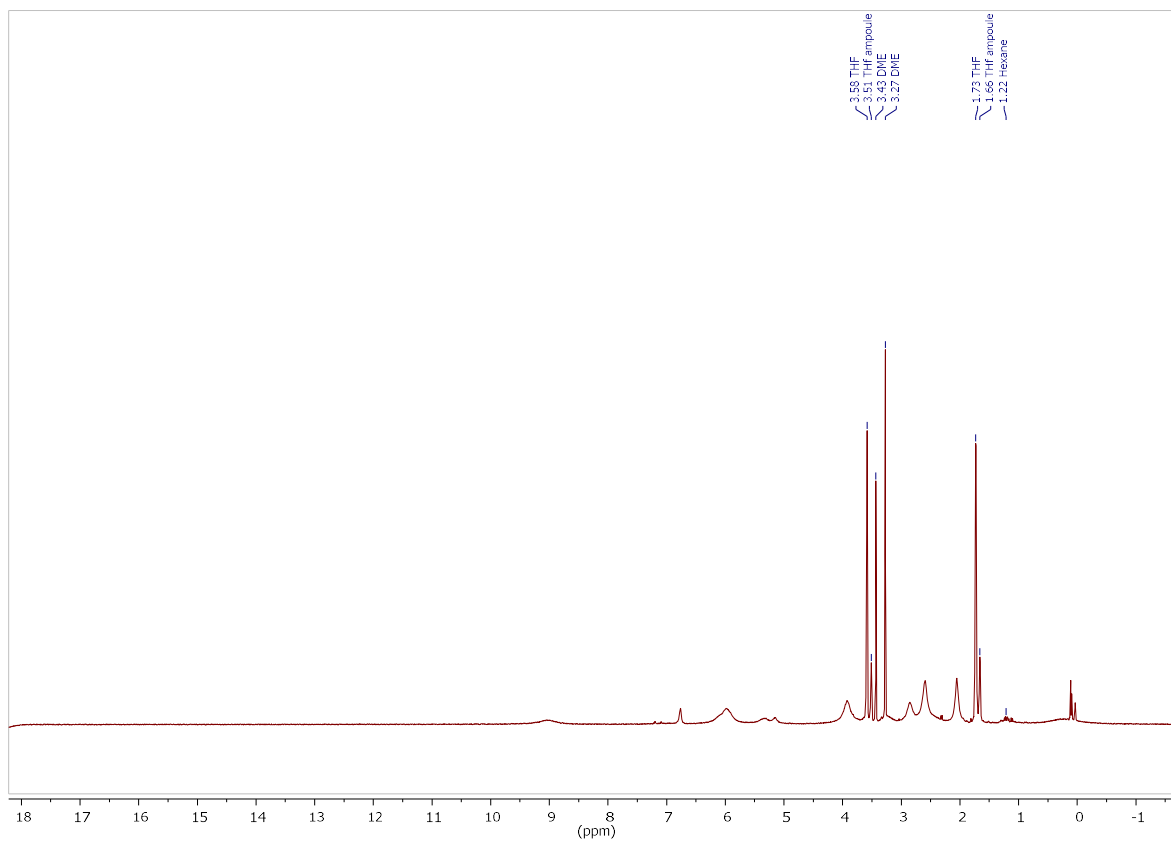

**Fig. S1.** <sup>1</sup>H NMR (300 MHz thf-d<sub>8</sub>, 25 °C) of (DME)[K(B-18-C-6)][L(Me<sub>2</sub>N)GaSb]<sub>2</sub> **3** for Evans' method.

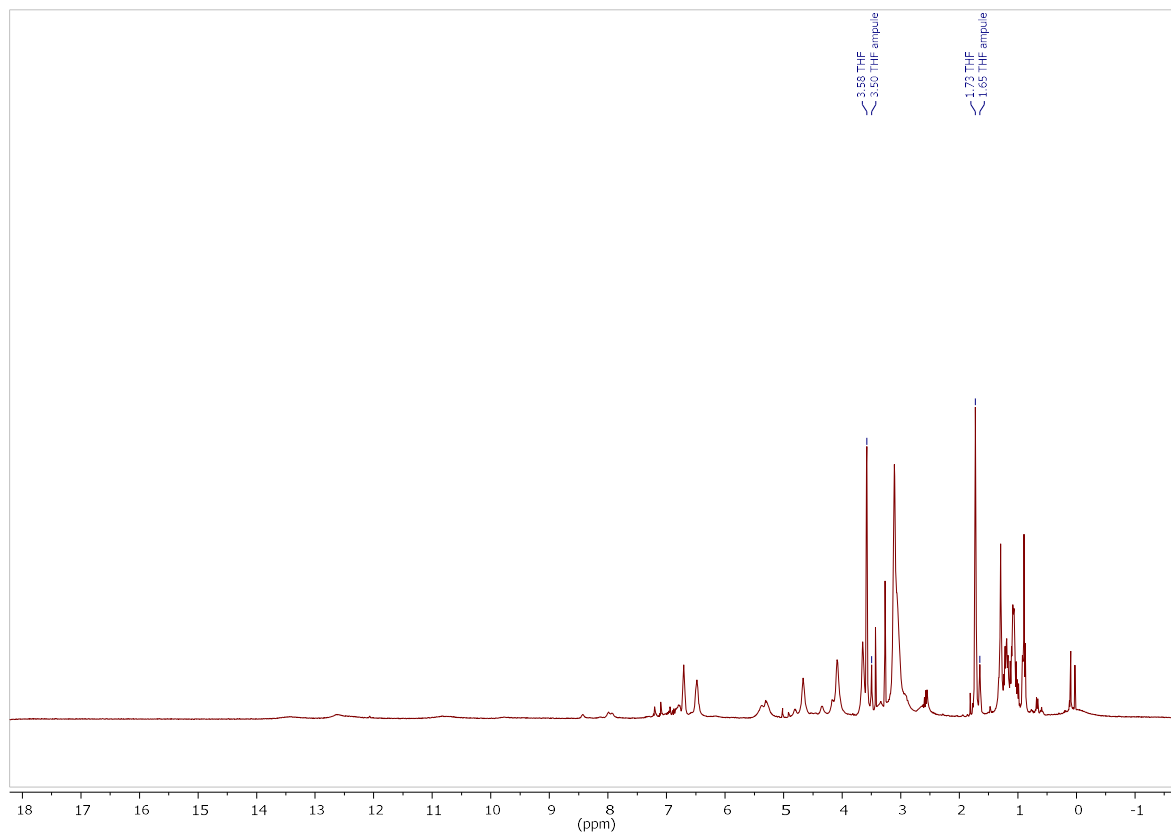

**Fig. S2.** <sup>1</sup>H NMR (300 MHz thf-d<sub>8</sub>, 25 °C) of (DME)[K(B-18-C-6)][L(Et<sub>2</sub>N)GaBi]<sub>2</sub> **4** for Evans' method.

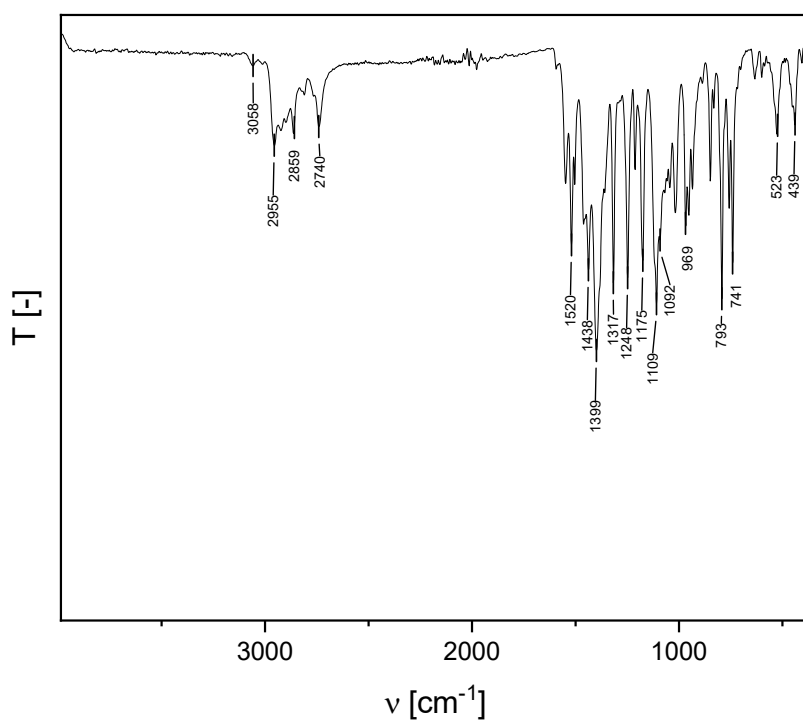

**Fig. S3.** ATR-IR spectrum of (DME)[K(B-18-C-6)][L(Me<sub>2</sub>N)GaSb]<sub>2</sub> **3**.

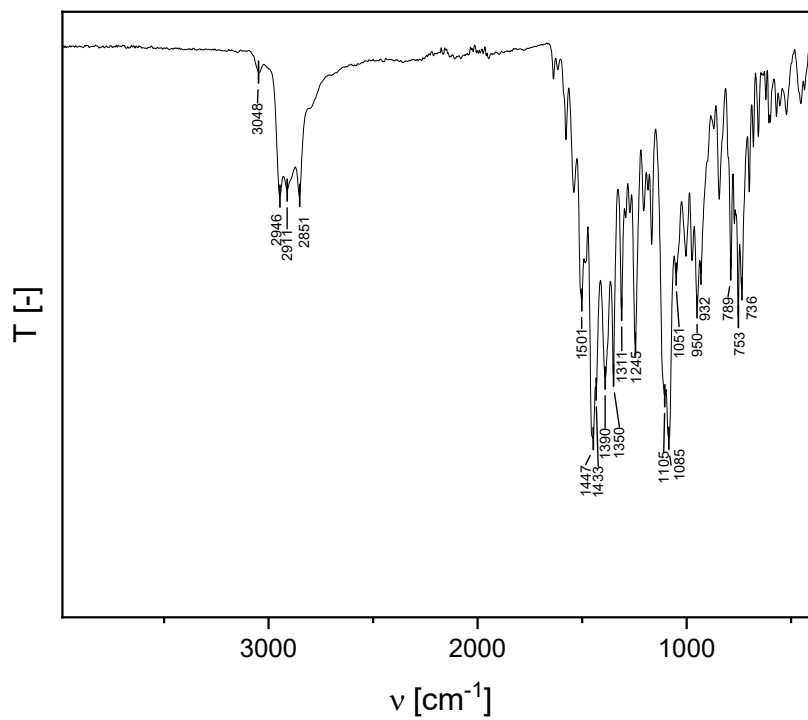

**Fig. S4.** ATR-IR spectrum of (DME)[K(B-18-C-6)][L(Et<sub>2</sub>N)GaBi]<sub>2</sub> **4**.

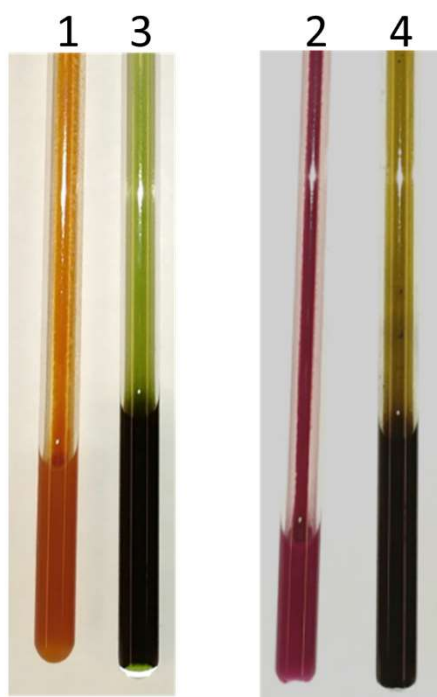

**Fig. S5.** Reduction reaction of 10 mg of the dipnictenes **1**, **2** and **3**, **4** with 1 eq. of  $\text{KC}_8$  in DME. The pictures were taken shortly after the preparation.

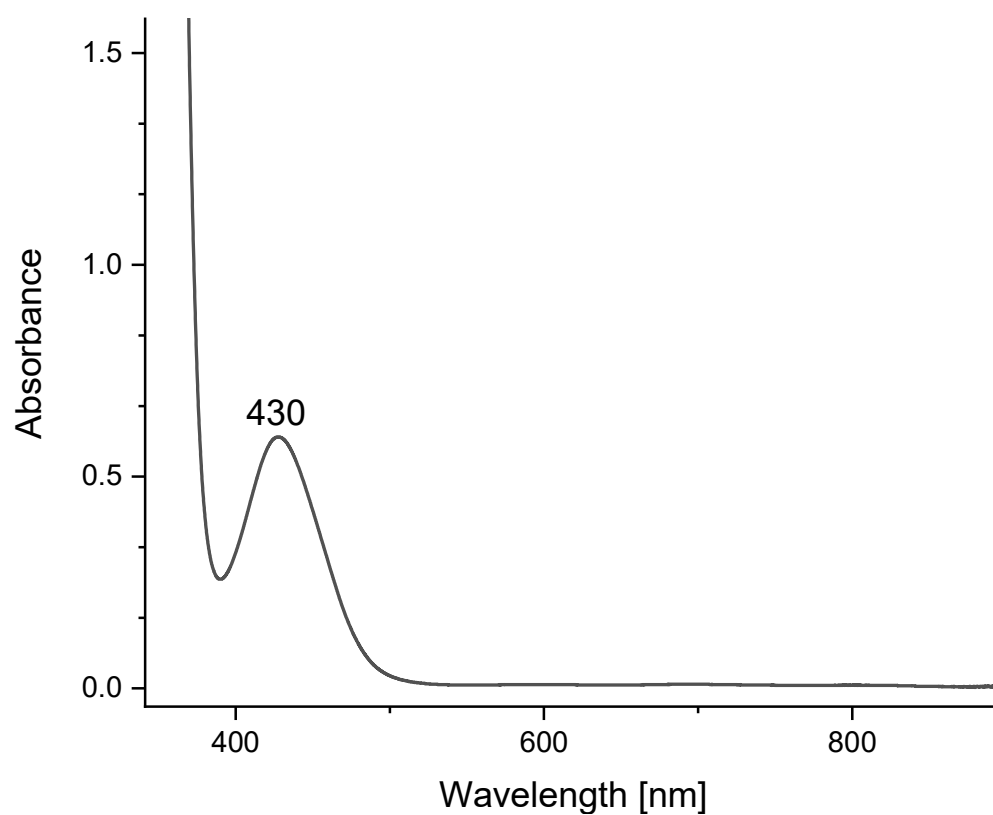

**Fig. S6.** UV-Vis spectrum of **1** in benzene solution.

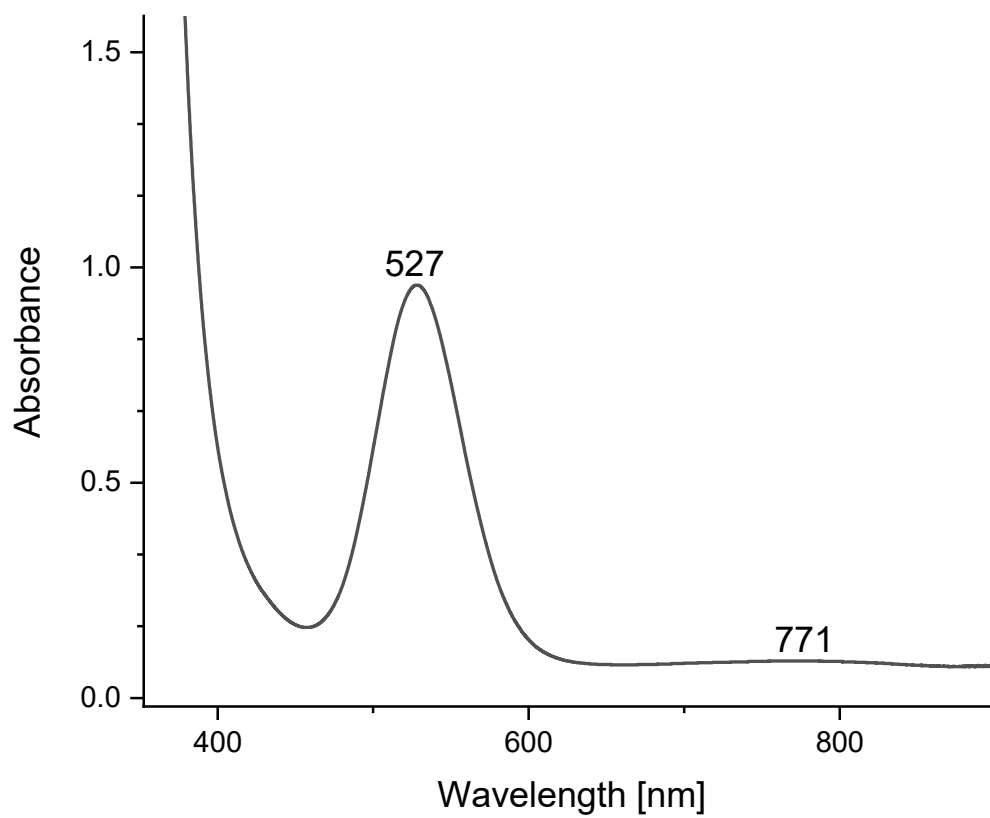

**Fig. S7.** UV-Vis spectrum of **2** in benzene solution.

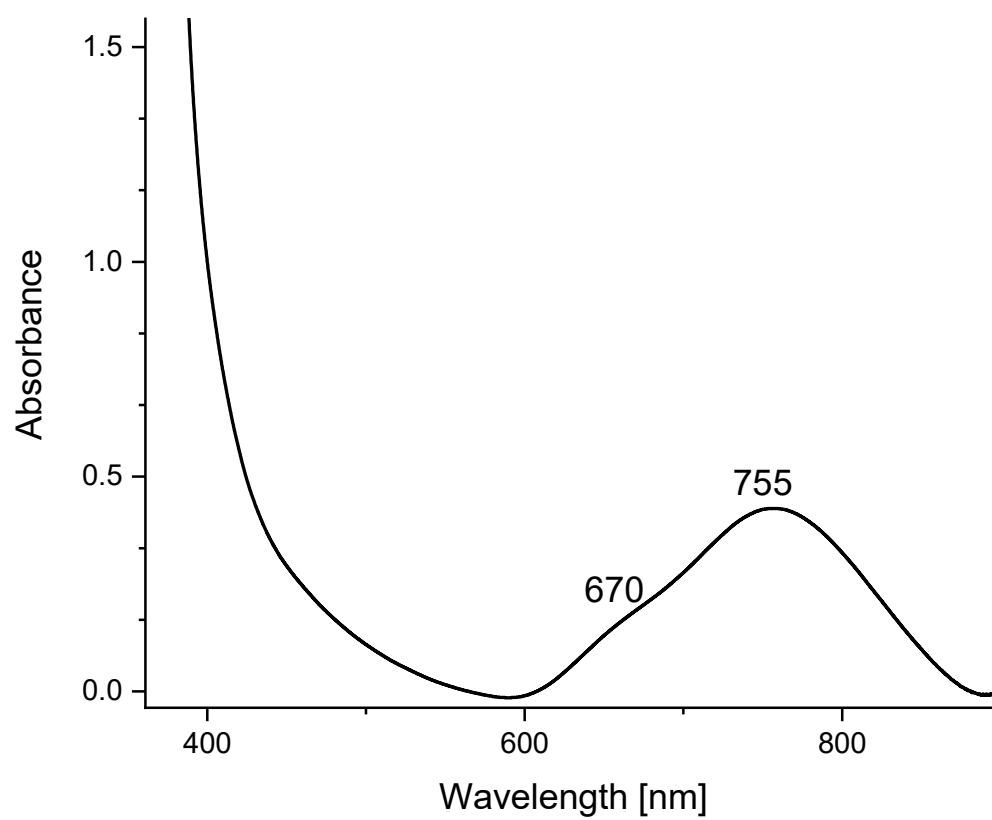

**Fig. S8.** UV-Vis spectrum of **3** in THF solution.

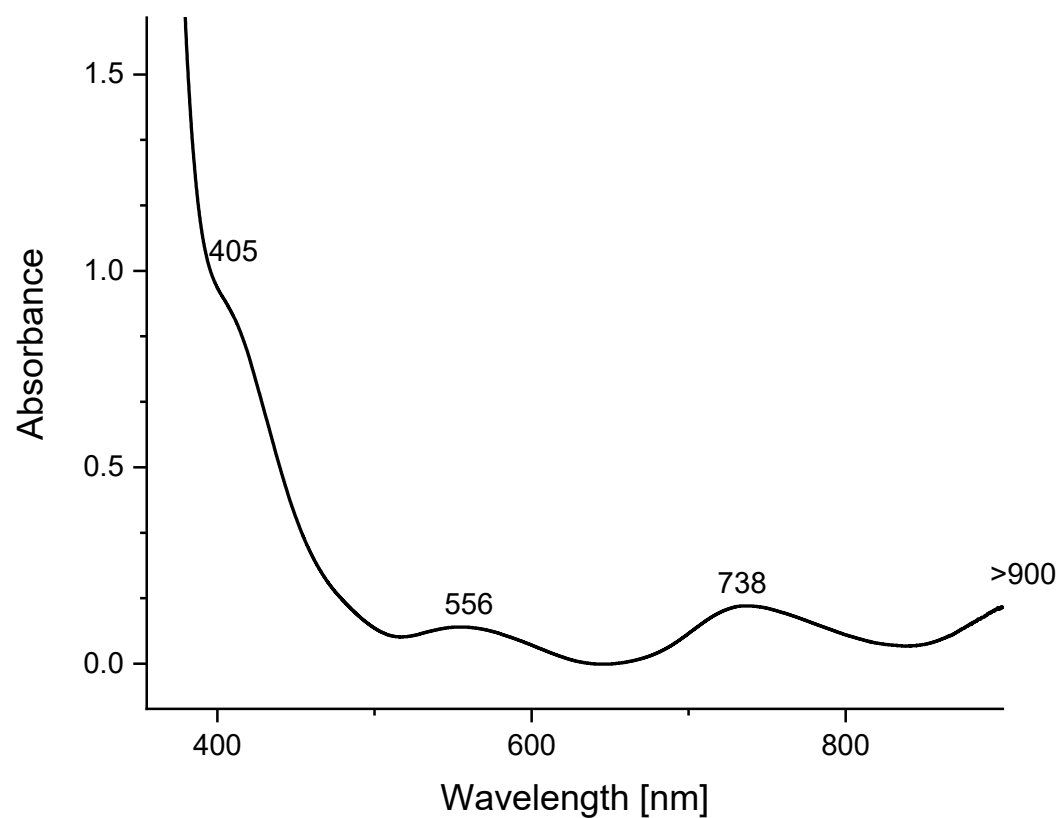

**Fig. S9.** UV-Vis spectrum of **4** in THF solution.

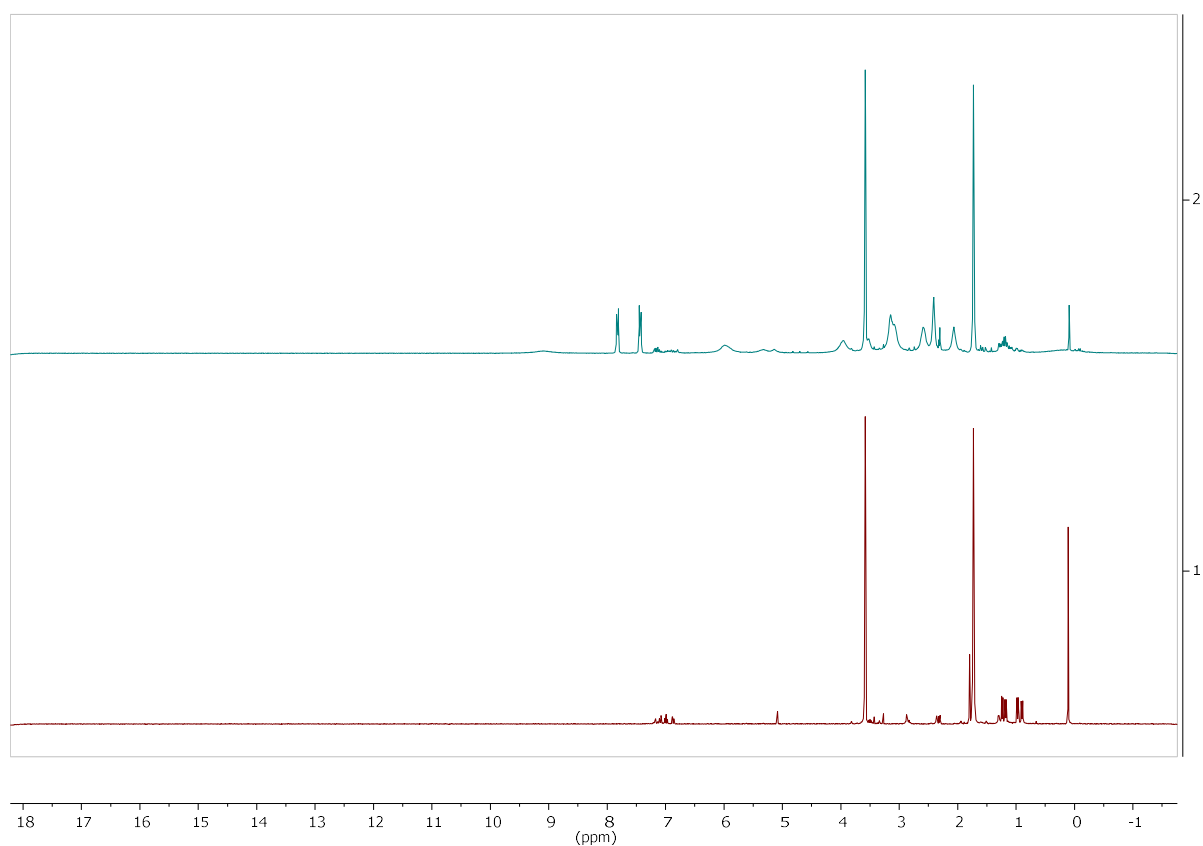

**Fig. S10.**  $^1\text{H}$  NMR spectrum (300 MHz, thf- $d_8$ , 25  $^\circ\text{C}$ ) of the reaction of  $[\text{L}(\text{Me}_2\text{N})\text{GaSb}]_2$  **1** and  $[\text{K cryp-2,2,2}]^+[\text{C}_{10}\text{H}_8]^-$  at ambient temperature. Bottom: before the addition of the reducing agent.

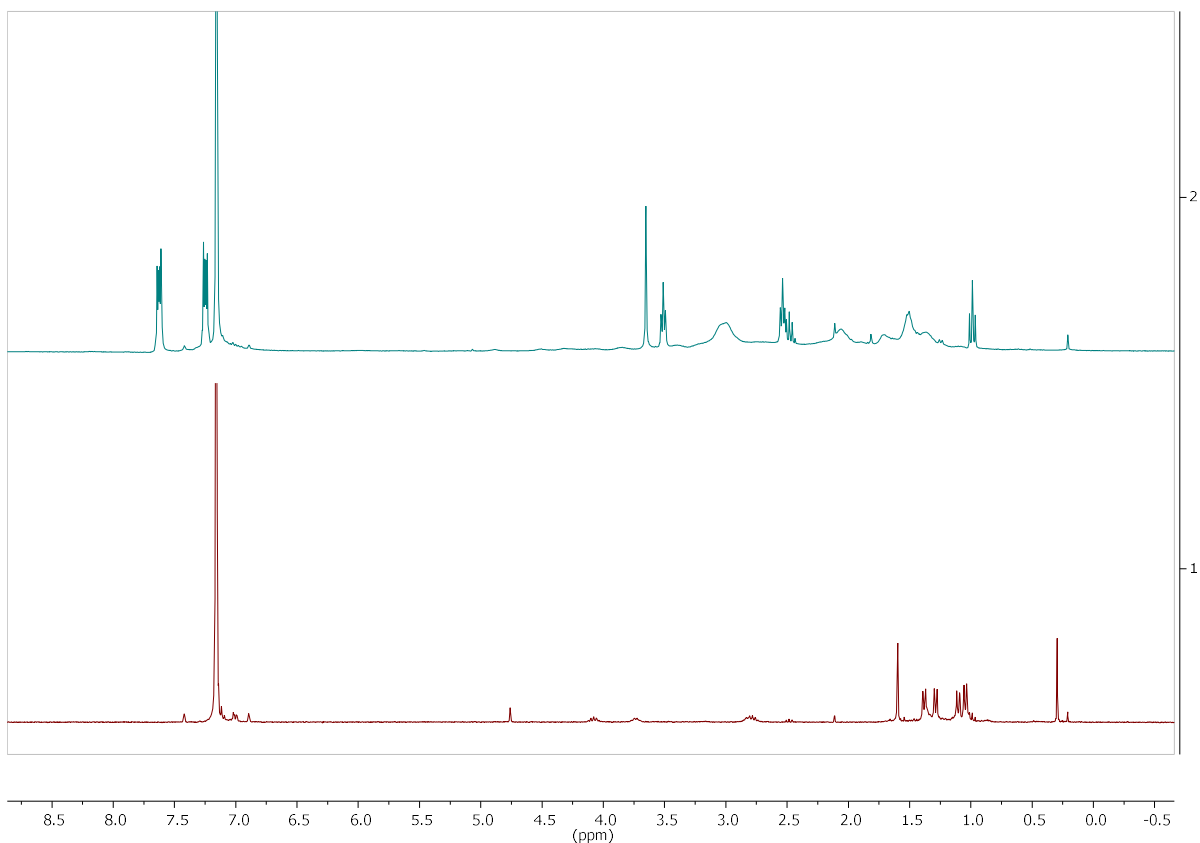

**Fig. S11.**  $^1\text{H}$  NMR spectrum (300 MHz,  $\text{C}_6\text{D}_6$ ) of the reaction of  $[\text{L}(\text{Et}_2\text{N})\text{GaBi}]_2$  **2** and  $[\text{K cryp-2,2,2}]^+[\text{C}_{10}\text{H}_8]^-$  at ambient temperature in  $\text{C}_6\text{D}_6$ . Bottom: before the addition of the reducing agent.

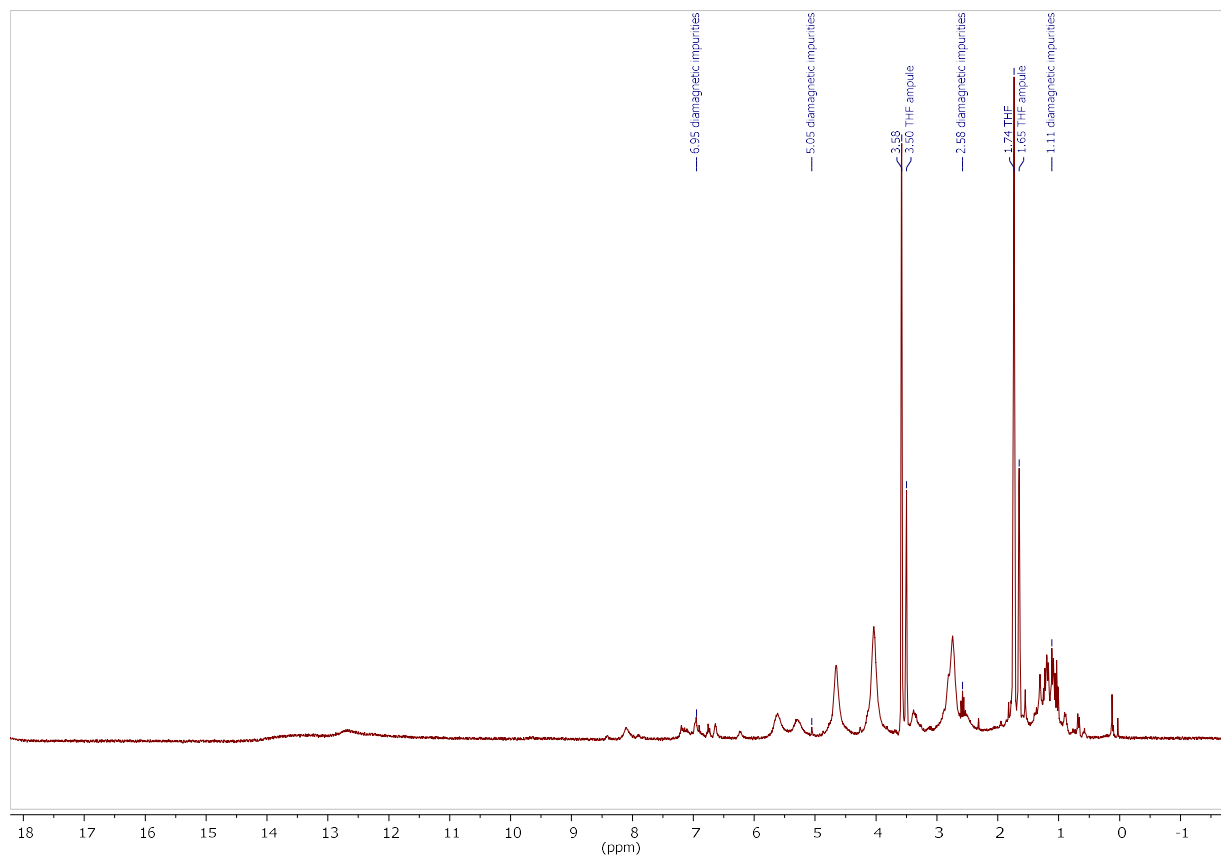

**Fig. S12.**  $^1\text{H}$  NMR (300 MHz thf- $\text{d}_8$ , 25 °C) of a freshly prepared  $[\text{K}(\text{B-18-C-6})][\text{L}(\text{Et}_2\text{N})\text{GaBi}]_2$  **4** solution for Evans' method.



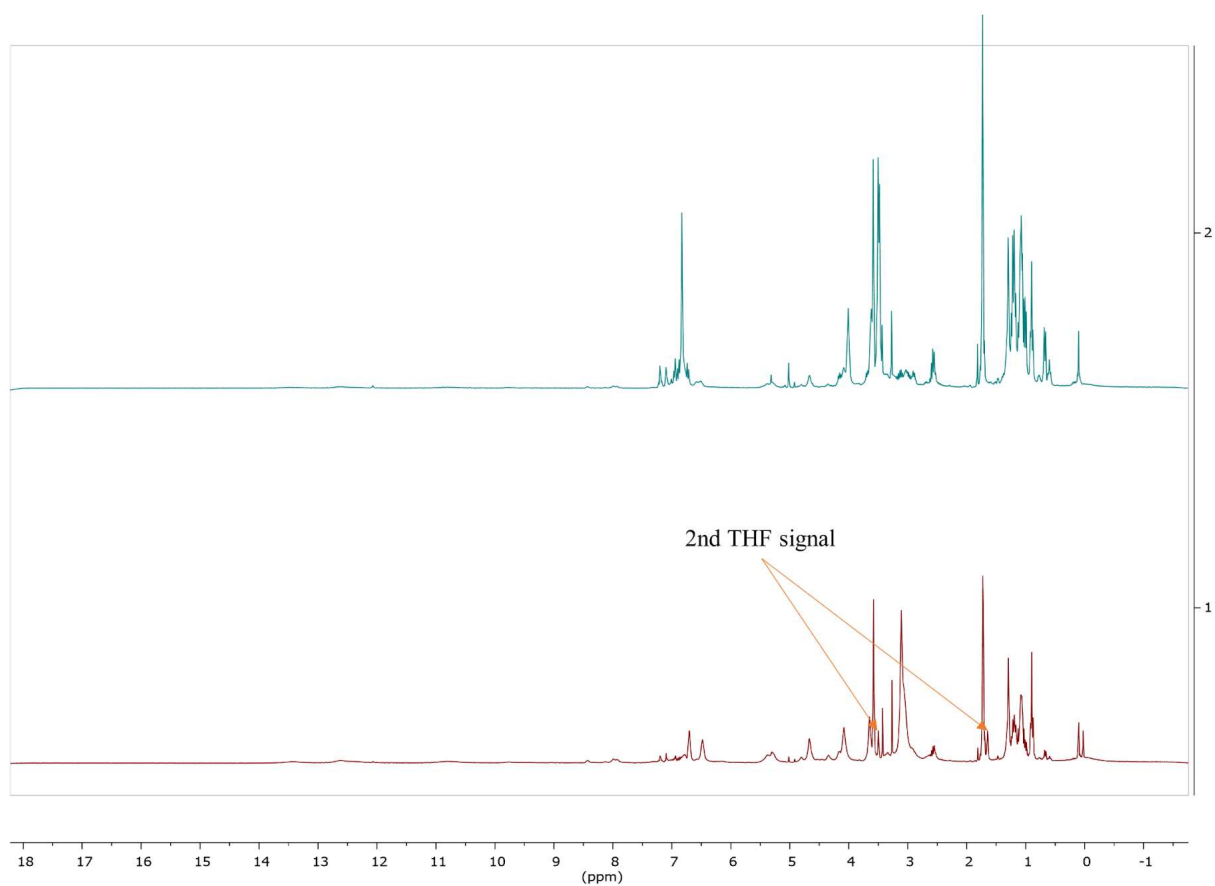

**Fig. S13.**  $^1\text{H}$  NMR (300 MHz thf- $d_8$ , 25  $^\circ\text{C}$ ) of  $[\text{K}(\text{B-18-C-6})][\text{L}(\text{Et}_2\text{N})\text{GaBi}]_2$  **4** for Evans' method. Bottom, measured after 20 min. Top, after 5 h.

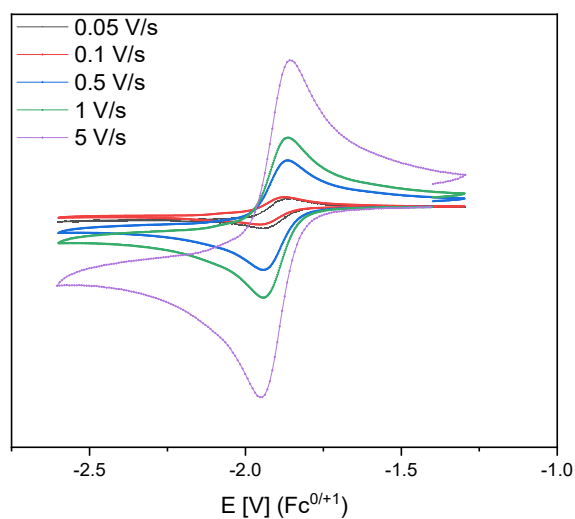

**Fig. S14.** Cyclic voltammograms of  $[\text{L}(\text{Me}_2\text{N})\text{GaSb}]_2$  **1** in THF solution (1 mM) at 45  $^\circ\text{C}$  containing  $[\text{n-Bu}_4\text{N}][\text{PF}_6]$  (100 mM) as electrolyte at varying scan rate showing the reversible reduction event.

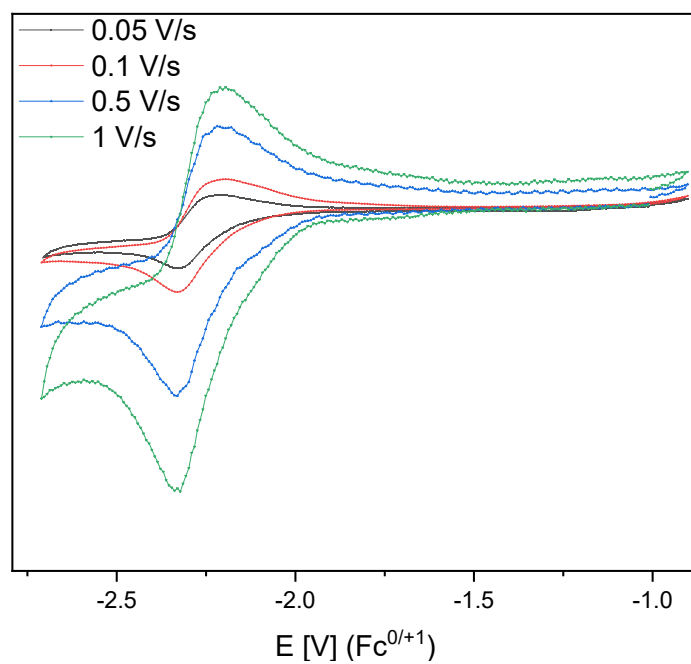

**Fig. S15.** Cyclic voltammograms of  $[L(Et_2N)GaBi]_2 \mathbf{2}$  in THF solution (1 mM) at 45 °C containing  $[n-Bu_4N][PF_6]$  (100 mM) as electrolyte at varying scan rate showing the reversible reduction event.

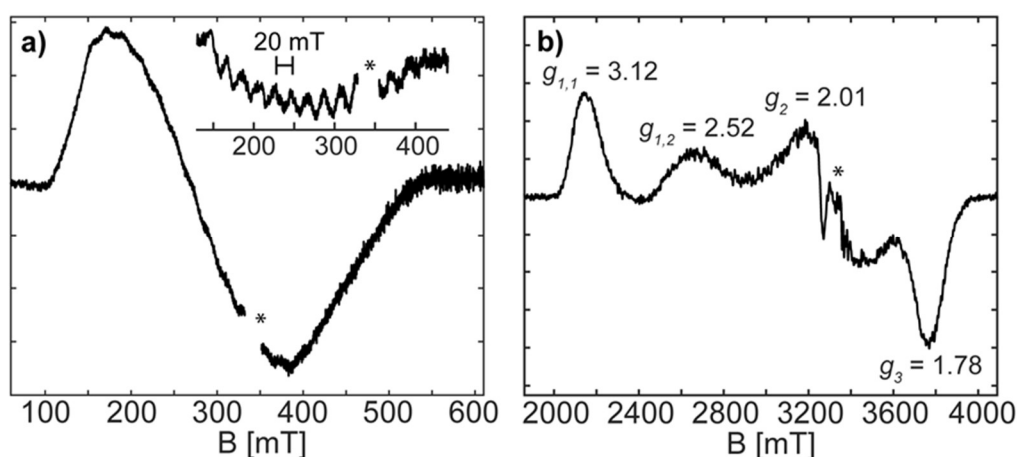

**Figure S16.** **a)** EPR spectra of frozen solutions of **4** as collected CW X-band derivative spectrum ( $\sim 9.64$  GHz, 6 K), insert: Bi hyperfine in the second derivative exhibiting a multiline pattern with approximately equal splitting of 20 mT ( $\sim 500$  MHz). **b)** First derivative of pulsed W-band EPR absorption spectrum (94.01 GHz, 7 K, smoothed over 20 points). The asterisks indicate small impurities originating from organic radicals in the sample (X-band) and transition metal contaminations in the resonator (W-band). Spectrometer conditions are described in the Experimental Section.

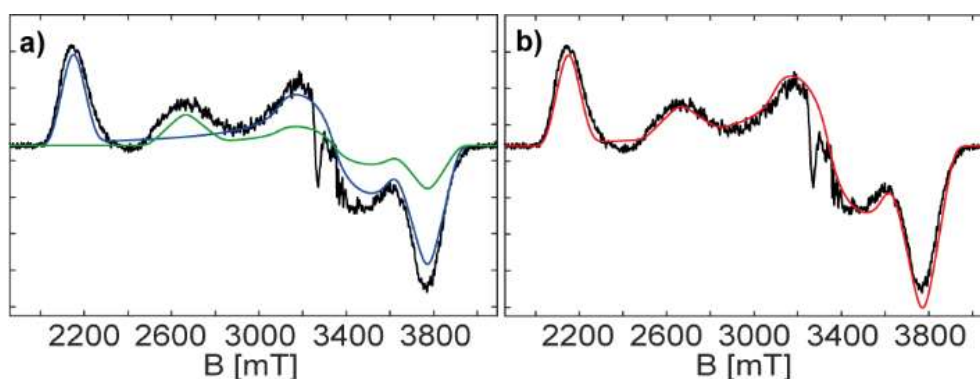

**Figure S17.** First derivative of pulsed W-band EPR absorption spectrum of **4** (94.01 GHz, 7 K, smoothed over 20 points) in black with **a)** the simulation of the two individual components (component **4-1** in blue, component **4-2** in green) and **b)** the sum of the individual simulations. EPR simulation parameters for component **4-1**:  $\mathbf{g} = [3.12 \ 2.01 \ 1.78]$ ,  $2 \times \mathbf{A}({}^{209}\text{Bi}) = [450 \ 700 \ 350]$  MHz, lw (linewidth, peak-to-peak) = 50 mT, weighted to 75 % of the total spin concentration. EPR simulation parameters for component **4-2**:  $\mathbf{g} = [2.52 \ 2.01 \ 1.78]$ ,  $2 \times \mathbf{A}({}^{209}\text{Bi}) = [600 \ 700 \ 350]$  MHz, lw (linewidth, peak-to-peak) = 50 mT, weighted to 25 % of the total spin concentration. Spectrometer conditions are described in the Experimental Section.

### Crystallographic Details.

The crystals were mounted on nylon loops in inert oil. Data of **3**, and **4** were collected on a Bruker AXS D8 Kappa diffractometer with APEX2 detector (mono-chromated  $\text{Mo}_{K\alpha}$  radiation,  $\lambda = 0.71073$  Å) at 100(2) K. The structures were solved by Direct Methods (SHELXS-97)<sup>1</sup> and refined anisotropically by full-matrix least-squares on  $F^2$  (SHELXL-2014)<sup>2,3</sup>. Absorption corrections were performed semi-empirically from equivalent reflections on basis of multi-scans (Bruker AXS APEX2). Hydrogen atoms were refined using a riding model or rigid methyl groups.

In **3** the dimethoxy ethane shows rather large displacement ellipsoids. Reducing the occupancy to 50% yields ellipsoids of realistic size but significantly increases the R-values. No residual electron density maxima giving an alternate orientation could be found, thus the model with partial occupancy was discarded. The structure contains highly disordered solvent – possibly n-hexane or dimethoxy ethane. The final refinement was done with a solvent free dataset from a PLATON/SQUEEZE run.<sup>4</sup> Since the nature and amount of the solvent is not clear it was not included in the sum formula. In **4** two ethyl groups are disordered over two positions. Their corresponding bond lengths and angle were restrained to be equal (SADI) and RIGU restraints were applied to their anisotropic displacement parameters. Due to their proximity, C65 and C65' were refined with common displacement parameters (EADP). The dimethoxy ethane ligand is disordered over two positions. All corresponding bond length and angle were restrained to be equal (SADI). The anisotropic displacement parameters of its atoms were refined with RIGU restraints. In addition, two highly disordered solvent molecules (either n-hexane or dimethoxy ethane or a mixture of both, exact occupancy unknown) could not be modelled sufficiently. The final refinement was done with a solvent free dataset from a PLATON/SQUEEZE run. Since the nature and exact amount of the solvent is not clear it was not included in the sum formula.

CCDC-2077932 (**3**), and -2080779 (**4**) contain the supplementary crystallographic data for this paper. These data can be obtained free of charge from The Cambridge Crystallographic Data Centre via [www.ccdc.cam.ac.uk/data\\_request/cif](http://www.ccdc.cam.ac.uk/data_request/cif).

**Table S1.** Crystallographic data of (DME)[K(B-18-C-6)][L(Me<sub>2</sub>N)GaSb]<sub>2</sub> (**3**) and (DME)[K(B-18-C-6)][L(Et<sub>2</sub>N)GaBi]<sub>2</sub> (**4**).

|                                                    | <b>3</b>                                                                                         | <b>4</b>                                                                                        |
|----------------------------------------------------|--------------------------------------------------------------------------------------------------|-------------------------------------------------------------------------------------------------|
| Empirical formula                                  | C <sub>89</sub> H <sub>145</sub> Ga <sub>2</sub> KN <sub>6</sub> O <sub>10</sub> Sb <sub>2</sub> | C <sub>89</sub> H <sub>143</sub> Bi <sub>2</sub> Ga <sub>2</sub> KN <sub>6</sub> O <sub>8</sub> |
| M                                                  | 1881.14                                                                                          | 2021.59                                                                                         |
| Crystal size [mm]                                  | 0.348 × 0.076 × 0.070                                                                            | 0.376 × 0.104 × 0.070                                                                           |
| T [K]                                              | 100(2)                                                                                           | 100(2)                                                                                          |
| Crystal system                                     | monoclinic                                                                                       | monoclinic                                                                                      |
| Space group                                        | <i>P</i> <sub>2</sub> <sub>1</sub> / <i>c</i>                                                    | <i>P</i> <sub>2</sub> <sub>1</sub> / <i>c</i>                                                   |
| a [Å]                                              | 19.3507(10)                                                                                      | 19.493(2)                                                                                       |
| b [Å]                                              | 17.6402(10)                                                                                      | 17.962(2)                                                                                       |
| c [Å]                                              | 31.0106(17)                                                                                      | 30.744(4)                                                                                       |
| α [°]                                              | 90                                                                                               | 90                                                                                              |
| β [°]                                              | 100.619(3)                                                                                       | 101.573(5)                                                                                      |
| γ [°]                                              | 90                                                                                               | 90                                                                                              |
| V [Å <sup>3</sup> ]                                | 10404.2(10)                                                                                      | 10546(2)                                                                                        |
| Z                                                  | 4                                                                                                | 4                                                                                               |
| D <sub>calc</sub> [g·cm <sup>-3</sup> ]            | 1.201                                                                                            | 1.273                                                                                           |
| μ(MoK <sub>α</sub> ) [mm <sup>-1</sup> ]           | 1.117                                                                                            | 3.920                                                                                           |
| Transmissions                                      | 0.75/0.65                                                                                        | 0.75/0.49                                                                                       |
| F(000)                                             | 3936                                                                                             | 4120                                                                                            |
| Index ranges                                       | -27 ≤ <i>h</i> ≤ 27<br>-25 ≤ <i>k</i> ≤ 25<br>-44 ≤ <i>l</i> ≤ 44                                | -27 ≤ <i>h</i> ≤ 27<br>-25 ≤ <i>k</i> ≤ 25<br>-43 ≤ <i>l</i> ≤ 43                               |
| θ <sub>max</sub> [°]                               | 30.589                                                                                           | 30.508                                                                                          |
| Reflections collected                              | 320168                                                                                           | 338181                                                                                          |
| Independ. reflections                              | 31900                                                                                            | 32182                                                                                           |
| R <sub>int</sub>                                   | 0.0746                                                                                           | 0.1112                                                                                          |
| Refined parameters                                 | 1020                                                                                             | 1091                                                                                            |
| R <sub>1</sub> [I > 2σ(I)]                         | 0.0438                                                                                           | 0.0433                                                                                          |
| wR <sub>2</sub> [all data]                         | 0.1102                                                                                           | 0.0985                                                                                          |
| GooF                                               | 1.079                                                                                            | 1.023                                                                                           |
| Δρ <sub>final</sub> (max/min) [e·Å <sup>-3</sup> ] | 1.804/-0.886                                                                                     | 4.127/-1.746                                                                                    |

## Computational details

The ORCA quantum chemistry package version (4.2.1)<sup>5-7</sup> was used for the DFT calculations. The geometric parameters of the species were optimized in the gas phase employing the PBE0 density functional<sup>8</sup> with ultrafine grid and Def2-SVP<sup>8</sup> basis set on H, C, N and Def2-TZVP<sup>9</sup> on Bi, Ga, Sb, utilizing atom-pairwise dispersion correction with Becke-Johnson damping scheme (D3BJ).<sup>10,11</sup> A small and medium effective core potential was employed on Sb and Bi respectively.<sup>12</sup> For **3** and **4** the respective minimally augmented Karlsruhe basis sets were used on Bi, N, Ga and Sb.<sup>13</sup> To accelerate the calculations the RIJCOSX approximation with ultrafine grid was utilized with the def-2J auxiliary basis sets,<sup>14</sup> as well as the AutoAux generation procedure for the diffuse basis sets.<sup>15</sup> Frequency calculations were carried out for all optimized structures. The electron densities and frontier molecular orbitals were calculated with Def2-TZVP<sup>9</sup> basis set on H, C, and Def2-QZVPP<sup>9</sup> on Bi, Ga, Sb, for **3** and **4** the respective minimally augmented Karlsruhe basis were used on Bi, N, Ga and Sb.<sup>13</sup> Electronic excitations were calculated analogous using the time-dependent DFT (TD-DFT) formalism utilizing ORCA quantum chemistry package version (5.0.0)<sup>5-7</sup> taking solvent effects (only thf for comparability) into account utilizing the conductor-like polarized continuum model (CPCM).<sup>16</sup> Natural bond orbital analysis was performed using the NBO 6.0 program.<sup>17</sup>

Atoms in molecules (AIM)<sup>18-20</sup> and electron localization function (ELF)<sup>21,22</sup> computations were performed with the Multiwfn program 3.7<sup>23</sup> replacing the inner-core density by a pseudo-potential.<sup>24</sup> The high-quality rectangular grid with a mesh size of 0.06 Bohr with basin boundary refinement was employed. VMD was developed by the Theoretical and Computational Biophysics Group in the Beckman Institute for Advanced Science and Technology at the University of Illinois at Urbana-Champaign and used to plot grid-data.<sup>25</sup>

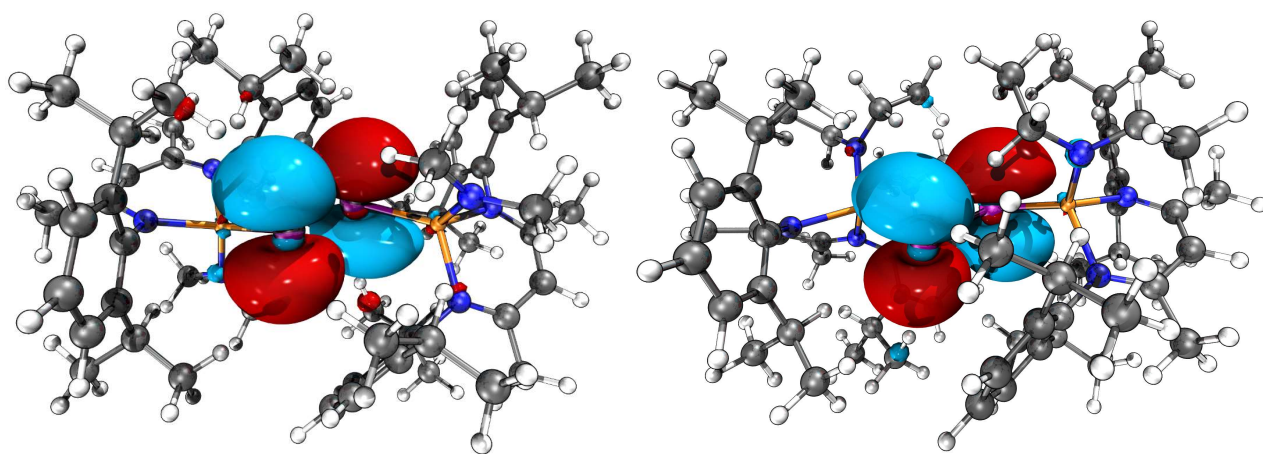

**Fig. S18.** Biorthogonalized SOMO of (DME)[K(B-18-C-6)][L(Me<sub>2</sub>N)GaSb]<sub>2</sub> **3** (left) and (DME)[K(B-18-C-6)][L(Et<sub>2</sub>N)GaBi]<sub>2</sub> **4** (right), isovalue 0.03.

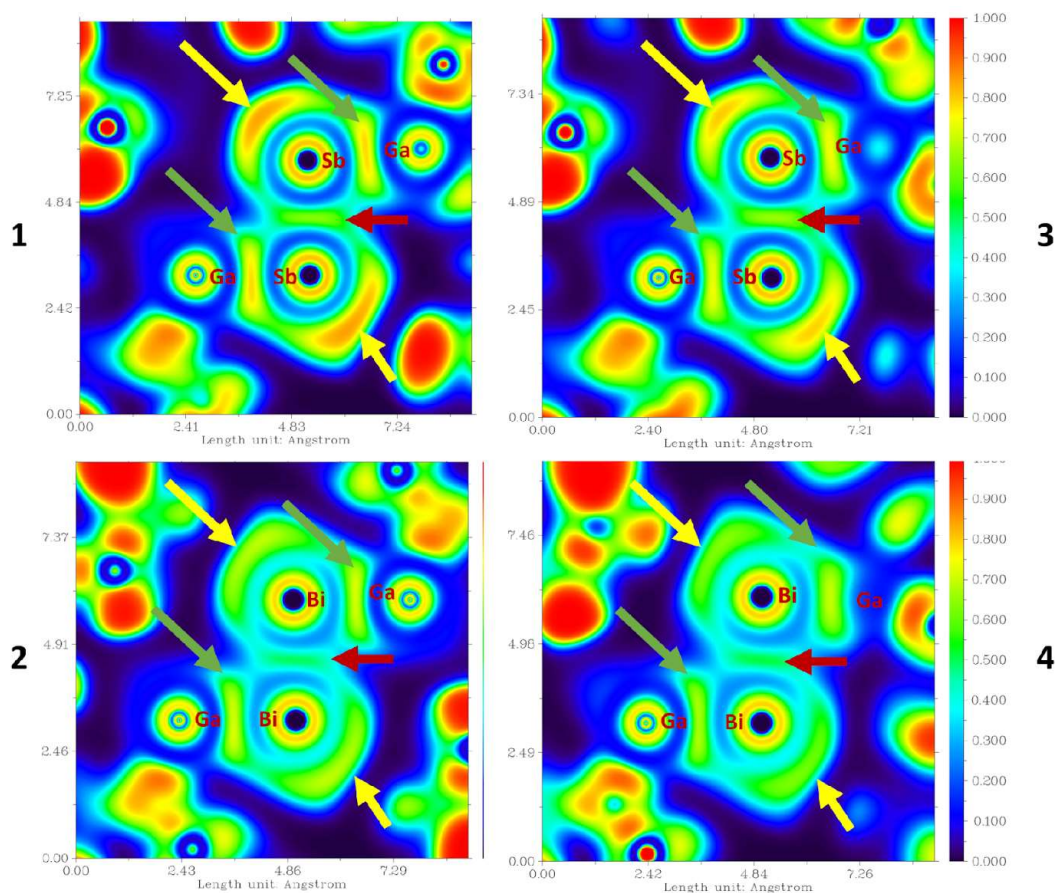

**Fig. S19.** ELF distribution in [(L(Me<sub>2</sub>N)GaSb)<sub>2</sub> **1**, (DME)[K(B-18-C-6)][L(Me<sub>2</sub>N)GaSb]<sub>2</sub> **3** and [(L(Et<sub>2</sub>N)GaBi)<sub>2</sub> **2**, (DME)[K(B-18-C-6)][L(Et<sub>2</sub>N)GaBi]<sub>2</sub> **4** in the M–E–E(–M) plane, V(M,E), V(E), and V(E,E) basins are indicated by green, yellow, and red arrows, respectively.

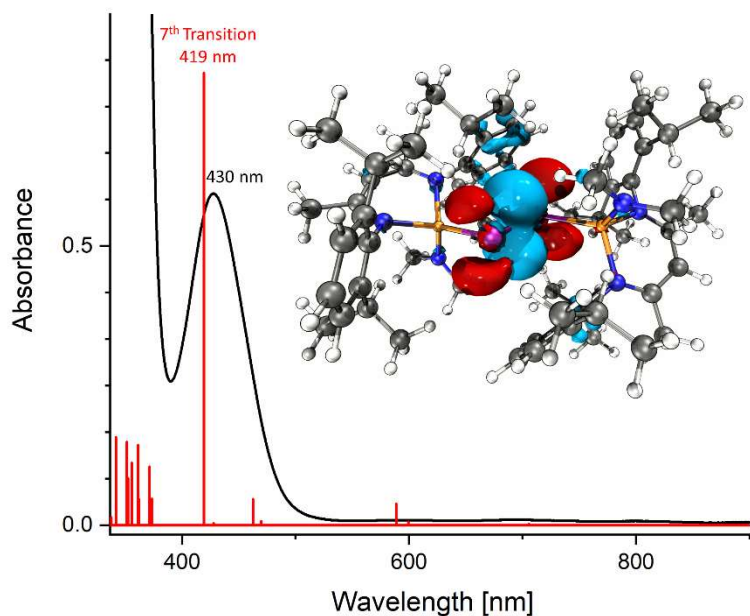

**Fig. S20.** UV-Vis spectrum of **1** (black), calculated transition maxima (red) and depiction of the electron difference density of the ground and excited state for the dominant transition.

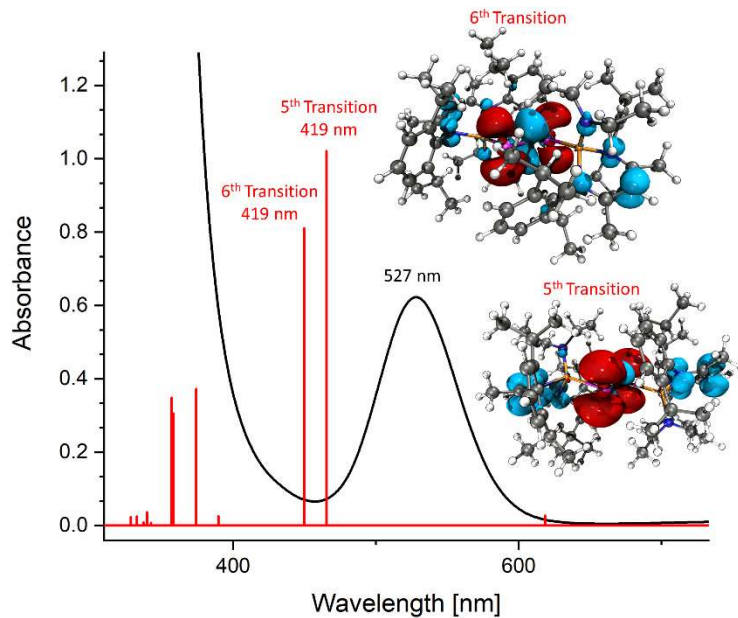

**Fig. S21.** UV-Vis spectrum of **2** (black), calculated transition maxima (red) and depiction of the electron difference density of the ground and excited state for the dominant transitions.



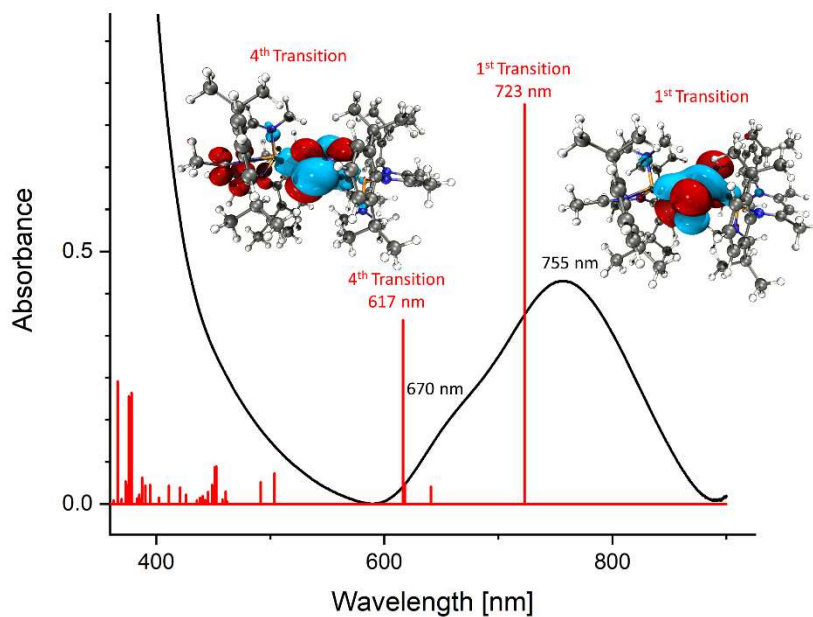

**Fig. S22.** UV-Vis spectrum of **3** (black), calculated transition maxima (red) and depiction of the electron difference density of the ground and excited state for the dominant transitions.

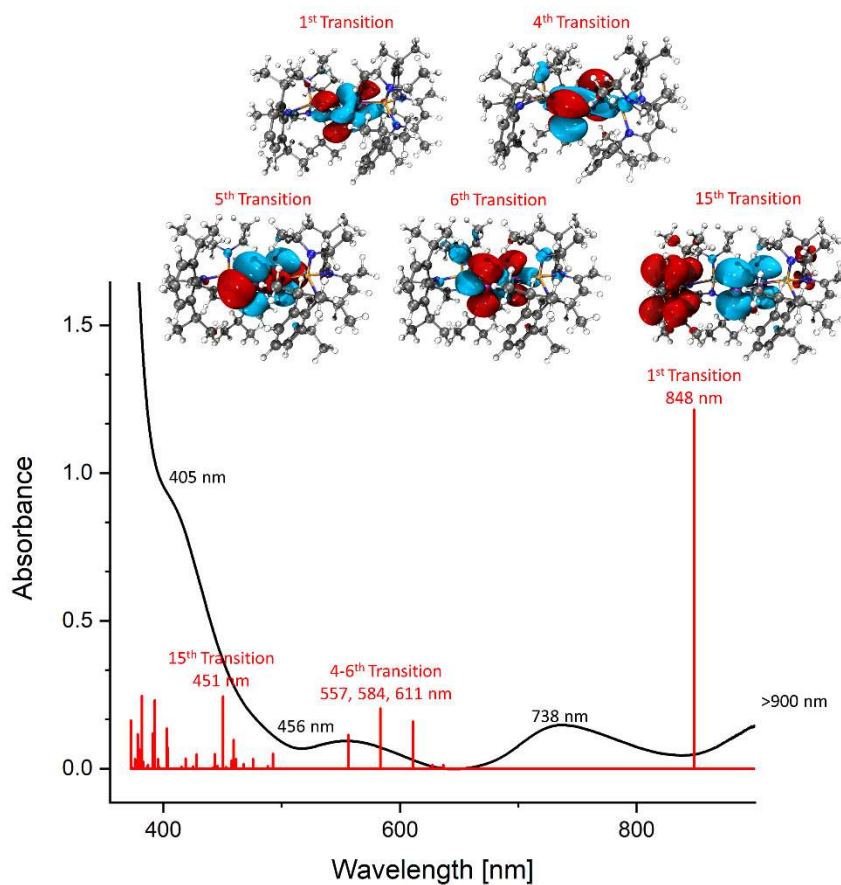

**Fig. S23.** UV-Vis spectrum of **4** (black), calculated transition maxima (red) and depiction of the electron difference density of the ground and excited state for the dominant transitions.

**Table S2.** Calculated X–Y bond lengths ( $r$ , Å) (exp.), X and Y NPA (AIM) atomic charges ( $q$ , |e|), Wiberg bond indices (WBI), occupation numbers (ON, |e|) of the  $\sigma$ XY bonds according to NBO analysis, populations of  $V(X,Y)$  ELF basins ( $\bar{N}[V(X,Y)]$ , e), and AIM parameters at the bond critical points ( $\rho(r_b)$ ,  $\Delta\rho(r_b)$ ,  $|V(r_b)|/G(r_b)$ ,  $H(r_b)$ , atomic units) for the  $\text{Ga}_2\text{Sb}_2$  skeleton of  $[\text{L}(\text{NMe}_2)\text{GaSb}]_2$  **1**.

| X-Y                    | $r(X-Y)$       | $q(X)$         | $q(Y)$           | WBI  | ON <sup>[a]</sup>                                         | $\bar{N}[V(X,Y)]$ <sup>[b]</sup>             | $\rho(r_b)$ | $\Delta\rho(r_b)$ | $ V(r_b) /G(r_b)$ | $H(r_b)$ |
|------------------------|----------------|----------------|------------------|------|-----------------------------------------------------------|----------------------------------------------|-------------|-------------------|-------------------|----------|
| Ga2-Sb1                | 2.60<br>(2.62) | 1.36<br>(1.37) | -0.16<br>(-0.16) | 0.97 | 1.96<br>0.392/0.608                                       | 2.259<br>0.975/1.264                         | 0.069       | -0.030            | 2.384             | -0.027   |
| Ga85-Sb84              | 2.60<br>(2.62) | 1.38<br>(1.34) | -0.16<br>(-0.16) | 0.96 | 1.96<br>0.390/0.601                                       | 2.297<br>0.997/1.280                         | 0.069       | -0.031            | 2.406             | -0.027   |
| Sb1–Sb84               | 2.62<br>(2.65) |                |                  | 1.82 | $\sigma$ 1.95<br>0.502/0.498<br>$\pi$ 1.91<br>0.501/0.499 | 1.438<br>0.660/0.764<br>1.410<br>0.728/0.671 | 0.076       | -0.011            | 2.009             | -0.030   |
| Sb1 lone-<br>Sb84 pair |                |                |                  |      | 1.94<br>1.93                                              | 2.720/2.691<br>2.619/2.584                   |             |                   |                   |          |

[a]: Squared polarization coefficients  $c_X$  ( $|c_X|^2$ ) of the  $\sigma$ XY bond NBOs. [b]: Contributions of  $X_1$ - $X_2$  electrons into the basins ( $\bar{N}[V(X_1, X_2)|X_1/X_2]$ , e) are given.

**Table S3.** Calculated X–Y bond lengths ( $r$ , Å) (exp.), X and Y NPA (AIM) atomic charges ( $q$ , |e|), Wiberg bond indices (WBI), occupation numbers (ON, |e|) of the  $\sigma$ XY bonds according to NBO analysis, populations of  $V(X,Y)$  ELF basins ( $\bar{N}[V(X,Y)]$ , e), and AIM parameters at the bond critical points ( $\rho(r_b)$ ,  $\Delta\rho(r_b)$ ,  $|V(r_b)|/G(r_b)$ ,  $H(r_b)$ , atomic units) for the  $\text{Ga}_2\text{Bi}_2$  skeleton of  $[\text{L}(\text{Et}_2\text{N})\text{GaBi}]_2$  **2**.

| X-Y                    | $r(X-Y)$       | $q(X)$         | $q(Y)$           | WBI  | ON <sup>[a]</sup>                                         | $\bar{N}[V(X,Y)]$ <sup>[b]</sup>              | $\rho(r_b)$ | $\Delta\rho(r_b)$ | $ V(r_b) /G(r_b)$ | $H(r_b)$ |
|------------------------|----------------|----------------|------------------|------|-----------------------------------------------------------|-----------------------------------------------|-------------|-------------------|-------------------|----------|
| Ga2-Bi1                | 2.67<br>(2.71) | 1.33<br>(1.33) | -0.10<br>(-0.11) | 0.98 | 1.96<br>0.411/0.589                                       | 2.216<br>1.031/1.161                          | 0.065       | -0.0154           | 2.199             | -0.023   |
| Ga91-Bi90              | 2.67<br>(2.71) | 1.33<br>(1.36) | -0.10<br>(-0.20) | 0.98 | 1.96<br>0.412/0.588                                       | 2.216<br>1.031/1.161                          | 0.065       | -0.0154           | 2.199             | -0.023   |
| Bi1–Bi90               | 2.77<br>(2.81) |                |                  | 1.81 | $\sigma$ 1.94<br>0.499/0.501<br>$\pi$ 1.90<br>0.500/0.500 | 1.323<br>0.693/0.617<br>1.324<br>0.617/0.6930 | 0.066       | -0.0429           | 1.655             | -0.020   |
| Bi1 lone-<br>Bi90 pair |                |                |                  |      | 1.95<br>1.95                                              | 2.860/2.830<br>2.860/2.831                    |             |                   |                   |          |

[a]: Squared polarization coefficients  $c_x$  ( $|c_x|^2$ ) of the  $\sigma$ XY bond NBOs. [b]: Contributions of  $X_1$ - $X_2$  electrons into the basins ( $\bar{N}[V(X_1, X_2)|X_1/X_2]$ , e) are given.

**Table S4.** Calculated X–Y bond lengths ( $r$ , Å) (exp.), X and Y NPA (AIM) atomic charges ( $q$ , |e|), Natural (Becks/AIM) spin density ( $\rho_s$ , |e|), Wiberg bond indices (WBI), occupation numbers (ON, |e|) of the  $\sigma_{XY}$  bonds according to NBO analysis for  $\alpha$  and  $\beta$  spin orbitals, populations of  $V(X,Y)$  ELF basins ( $\bar{N}V(X,Y)$ , e), and AIM parameters at the bond critical points ( $\rho(r_b)$ ,  $\Delta\rho(r_b)$ ,  $|V(r_b)|/G(r_b)$ ,  $H(r_b)$ , atomic units) for the  $\text{Ga}_2\text{Sb}_2$  skeleton of (DME)[K(B-18-C-6)][L(Me<sub>2</sub>N)GaSb]<sub>2</sub> **3**.

| X-Y                    | $r(X-Y)$       | $q(X)$         | $q(Y)$           | $\rho_s(X)$             | $\rho_s(Y)$             | WBI  | ON( $\alpha$ ) <sup>[a]</sup> | ON( $\beta$ ) <sup>[a]</sup>                              | $\bar{N}[V(X,Y)]$ <sup>[b]</sup>             | $\rho(r_b)$ | $\Delta\rho(r_b)$ | $ V(r_b) /G(r_b)$ | $H(r_b)$ |
|------------------------|----------------|----------------|------------------|-------------------------|-------------------------|------|-------------------------------|-----------------------------------------------------------|----------------------------------------------|-------------|-------------------|-------------------|----------|
| Ga2-Sb1                | 2.56<br>(2.60) | 1.35<br>(1.27) | -0.49<br>(-0.39) | 0.01<br>(0.02/<br>0.01) | 0.47<br>(0.44/<br>0.43) | 1.08 | 0.95<br>0.376/0.624           | 0.95<br>0.386/0.614                                       | 2.215<br>1.149/1,043                         | 0.07<br>1   | -0.0270           | 2.317             | -0.028   |
| Ga85-Sb84              | 2.56<br>(2.58) | 1.37<br>(1.24) | -0.51<br>(-0.39) | 0.02<br>(0.03/<br>0.01) | 0.45<br>(0.43/<br>0.42) | 1.08 | 0.95<br>0.377/0.623           | 0.95<br>0.383/0.617                                       | 2.232<br>1.173/1.037                         | 0.07<br>2   | -0.0273           | 2.318             | -0.028   |
| Sb1–Sb84               | 2.73<br>(2.73) |                |                  |                         |                         | 1.37 | $\sigma$ 0.97<br>0.500/0.500  | $\sigma$ 0.97<br>0.499/0.501<br>$\pi$ 0.93<br>0.494/0.506 | 0.912<br>0.683/0.637<br>0.785<br>0.396/0.387 | 0.06<br>5   | -0.0013           | 2.015             | -0.022   |
| Sb1 lone-<br>Sb84 pair |                |                |                  |                         |                         |      | 0.96/0.92<br>0.96/0.92        | 0.96<br>0.95                                              | 3,747/3.687<br>3.740/3.671                   |             |                   |                   |          |

[a]: Squared polarization coefficients  $c_X$  ( $|c_X|^2$ ) of the  $\sigma_{XY}$  bond NBOs. [b]: Contributions of  $X_1$ - $X_2$  electrons into the basins ( $\bar{N}[V(X_1, X_2)|X_1/X_2]$ , e) are given.

**Table S5.** Calculated X–Y bond lengths (r, Å) (exp.), X and Y NPA (AIM) atomic charges (q, |e|), Natural (Becks/AIM) spin density ( $\rho_s$ , |e|), Wiberg bond indices (WBI), occupation numbers (ON, |e|) of the  $\sigma_{XY}$  bonds according to NBO analysis for  $\alpha$  and  $\beta$  spin orbitals, populations of V(X,Y) ELF basins ( $\bar{N}[V(X,Y)]$ , e), and AIM parameters at the bond critical points ( $\rho(r_b)$ ,  $\Delta\rho(r_b)$ ,  $|V(r_b)|/G(r_b)$ ,  $H(r_b)$ , atomic units) for the Ga<sub>2</sub>Bi<sub>2</sub> skeleton of (DME)[K(B-18-C-6)][L(Et<sub>2</sub>N)GaBi]<sub>2</sub> **4**.

| X-Y                   | r(X-Y)         | q(X)           | q(Y)             | $\rho_s(X)$             | $\rho_s(Y)$             | WBI  | ON( $\alpha$ ) <sup>[a]</sup> | ON( $\beta$ ) <sup>[a]</sup>                              | $\bar{N}[V(X,Y)]$ <sup>[b]</sup>             | $\rho(r_b)$ | $\Delta\rho(r_b)$ | $ V(r_b) /G(r_b)$ | $H(r_b)$ |
|-----------------------|----------------|----------------|------------------|-------------------------|-------------------------|------|-------------------------------|-----------------------------------------------------------|----------------------------------------------|-------------|-------------------|-------------------|----------|
| Ga3-Bi1               | 2.64<br>(2.70) | 1.34<br>(1.24) | -0.44<br>(-0.33) | 0.01<br>(0.02/<br>0.01) | 0.49<br>(0.47/<br>0.45) | 1.09 | 0.95<br>0.339/0.605           | 0.94<br>0.406/0.594                                       | 2.195<br>1.200/0.968                         | 0.066       | -0.0065           | 2.074             | -0.024   |
| Ga4-Bi2               | 2.64<br>(2.68) | 1.34<br>(1.24) | -0.47<br>(-0.35) | 0.02<br>(0.02/<br>0.01) | 0.43<br>(0.42/<br>0.40) | 1.09 | 0.94<br>0.391/0.609           | 0.94<br>0.400/0.600                                       | 2.202<br>1.199/0.974                         | 0.066       | -0.0062           | 2.071             | -0.023   |
| Bi1–Bi2               | 2.89<br>(2.93) |                |                  |                         |                         | 1.35 | $\sigma$ 0.97<br>0.503/0.407  | $\sigma$ 0.97<br>0.501/0.499<br>$\pi$ 0.92<br>0.476/0.524 | 0.697<br>0.345/0.350<br>0.734<br>0.372/0.360 | 0.054       | 0.0311            | 1.647             | -0.014   |
| Bi1 lone-<br>Bi2 pair |                |                |                  |                         |                         |      | 0.96/0.92<br>0.96/0.92        | 0.96<br>0.95                                              | 3,961/3.897<br>3.972/3.906                   |             |                   |                   |          |

[a]: Squared polarization coefficients  $c_X$  ( $|c_X|^2$ ) of the  $\sigma_{XY}$  bond NBOs. [b]: Contributions of  $X_1$ - $X_2$  electrons into the basins ( $\bar{N}[V(X_1, X_2)|X_1/X_2]$ , e) are given.

**Table S6.** Overview of most intense calculated UV-Vis transition by TD-DFT for **1-4**.

|          | Excited State | Excitation energy E [cm <sup>-1</sup> ] | Wavelength $\lambda$ [nm] | Oscillator strength f (electric/velocity) | Transition orbital contribution (> 5%)                                                                                                                                                      |
|----------|---------------|-----------------------------------------|---------------------------|-------------------------------------------|---------------------------------------------------------------------------------------------------------------------------------------------------------------------------------------------|
| <b>1</b> | 7             | 23852.4                                 | 419.2                     | 0.149/0.200                               | HOMO-4 $\rightarrow$ LUMO (7.1)<br>HOMO-3 $\rightarrow$ LUMO (71.1)                                                                                                                         |
|          | 5             | 21485.4                                 | 465.4                     | 0.094/0.095                               | HOMO-4 $\rightarrow$ LUMO (53.8)<br>HOMO-3 $\rightarrow$ LUMO (39.2)                                                                                                                        |
| <b>2</b> | 6             | 22232.8                                 | 449.8                     | 0.074/0.168                               | HOMO-4 $\rightarrow$ LUMO (43.6)<br>HOMO-3 $\rightarrow$ LUMO (45.3)                                                                                                                        |
|          | 1             | 13829.7                                 | 723.1                     | 0.055/0.117                               | HOMO-1( $\beta$ ) $\rightarrow$ SOMO (6.4)<br>HOMO ( $\beta$ ) $\rightarrow$ SOMO (88.7)                                                                                                    |
| <b>3</b> | 4             | 16219.7                                 | 616.5                     | 0.025/0.026                               | SOMO $\rightarrow$ LUMO( $\alpha$ )+1 (21.6)<br>HOMO-1( $\beta$ ) $\rightarrow$ SOMO (68.4)                                                                                                 |
|          | 1             | 11783.3                                 | 848.7                     | 0.056/0.231                               | HOMO ( $\beta$ ) $\rightarrow$ SOMO (96.6)                                                                                                                                                  |
| <b>4</b> | 4             | 16365.5                                 | 611.0                     | 0.007/0.0165                              | HOMO-3 ( $\beta$ ) $\rightarrow$ SOMO (16.9)<br>HOMO-2 ( $\beta$ ) $\rightarrow$ SOMO (16.6)<br>HOMO-1 ( $\beta$ ) $\rightarrow$ SOMO (61.0)                                                |
|          | 5             | 17135.6                                 | 583.6                     | 0.009/0.0194                              | SOMO $\rightarrow$ LUMO( $\alpha$ )+2 (81.7)<br>SOMO $\rightarrow$ LUMO( $\alpha$ )+15 (11.1)                                                                                               |
|          | 6             | 17970.0                                 | 556.5                     | 0.005/0.004                               | HOMO-4 ( $\beta$ ) $\rightarrow$ SOMO (32.2)<br>HOMO-3 ( $\beta$ ) $\rightarrow$ SOMO (8.3)<br>HOMO-2 ( $\beta$ ) $\rightarrow$ SOMO (28.0)<br>HOMO-1 ( $\beta$ ) $\rightarrow$ SOMO (27.2) |
|          | 15            | 22194.4                                 | 450.6                     | 0.011/0.004                               | SOMO $\rightarrow$ LUMO( $\alpha$ )+4 (55.0)<br>SOMO $\rightarrow$ LUMO( $\alpha$ )+5 (27.9)                                                                                                |

**Table S7.** Cartesian coordinates of [L(Me<sub>2</sub>N)GaSb]<sub>2</sub> **1** [Å] for the optimized geometry.

|    |             |             |             |    |             |              |              |
|----|-------------|-------------|-------------|----|-------------|--------------|--------------|
| Sb | -2.88665266 | 7.222704001 | 0.019784319 | Sb | -1.66968342 | 4.907113154  | -0.171072979 |
| Ga | -2.07422035 | 7.386233793 | 2.488356019 | Ga | -2.24156069 | 4.574618883  | -2.690562137 |
| N  | -3.19319325 | 8.705441787 | 3.476035536 | N  | -1.5356504  | 2.835866994  | -3.345579495 |
| N  | -2.52950357 | 5.904361454 | 3.766235917 | N  | -1.00536655 | 5.647836787  | -3.860513821 |
| N  | -0.27019253 | 7.794138561 | 2.766032219 | N  | -3.97753918 | 4.727296312  | -3.36930266  |
| C  | -3.36394732 | 8.624357456 | 4.791494006 | C  | -1.04058117 | 2.710743653  | -4.574412575 |
| C  | -3.09679303 | 7.460628558 | 5.529287206 | C  | -0.66021789 | 3.800605033  | -5.37256607  |
| H  | -3.25004043 | 7.532162828 | 6.605123238 | H  | -0.28602596 | 3.554115641  | -6.366060056 |
| C  | -2.81266635 | 6.171257803 | 5.036540236 | C  | -0.51968478 | 5.15053947   | -4.987361745 |
| C  | -3.85675405 | 9.828832251 | 5.545203343 | C  | -0.87477902 | 1.334990393  | -5.159350603 |
| H  | -3.04302636 | 10.56876593 | 5.61004173  | H  | -1.86283691 | 0.932942067  | -5.432686349 |
| H  | -4.17013485 | 9.565761408 | 6.562476815 | H  | -0.24760786 | 1.356827538  | -6.058494943 |
| H  | -4.68680467 | 10.32300522 | 5.023586489 | H  | -0.44195226 | 0.63674131   | -4.430200436 |
| C  | -2.84186413 | 5.049491732 | 6.038479066 | C  | 0.25984239  | 6.020907676  | -5.937261377 |
| H  | -3.30523081 | 4.146890279 | 5.618335109 | H  | 0.28922614  | 7.068870722  | -5.617105957 |
| H  | -3.37829236 | 5.347171837 | 6.947276869 | H  | 1.29019419  | 5.648136519  | -6.029513179 |
| H  | -1.81307753 | 4.776106932 | 6.318146308 | H  | -0.19252589 | 5.963418584  | -6.938492406 |
| C  | -3.80718922 | 9.75210268  | 2.730205087 | C  | -1.66890775 | 1.700044083  | -2.493451427 |
| C  | -5.15621663 | 9.590155837 | 2.335710465 | C  | -0.60822934 | 1.393555152  | -1.606827362 |
| C  | -5.76776643 | 10.6150852  | 1.61049079  | C  | -0.73434005 | 0.273655124  | -0.781158034 |
| H  | -6.81252626 | 10.50766113 | 1.309847262 | H  | 0.07671201  | 0.018772946  | -0.097667534 |
| C  | -5.06861925 | 11.76298511 | 1.254402406 | C  | -1.87717266 | -0.518575227 | -0.804823471 |
| H  | -5.56385166 | 12.55422499 | 0.686656401 | H  | -1.95255797 | -1.392848474 | -0.153497967 |
| C  | -3.73260963 | 11.88859438 | 1.610793519 | C  | -2.92590394 | -0.18219778  | -1.648836457 |
| H  | -3.17786497 | 12.78212918 | 1.313196375 | H  | -3.83354556 | -0.790984011 | -1.651163957 |
| C  | -3.07733013 | 10.89304492 | 2.343135477 | C  | -2.84793101 | 0.926339701  | -2.498613075 |
| C  | -5.94408368 | 8.340081424 | 2.681519218 | C  | 0.64366033  | 2.25073053   | -1.543756461 |
| H  | -5.21800918 | 7.583639144 | 3.014501233 | H  | 0.3259362   | 3.282569803  | -1.770378853 |
| C  | -6.67698998 | 7.772915277 | 1.468016957 | C  | 1.27686254  | 2.259446802  | -0.15627557  |
| H  | -7.4609373  | 8.454779387 | 1.103674017 | H  | 1.72154104  | 1.284673113  | 0.099049195  |
| H  | -7.16964942 | 6.824453431 | 1.729241657 | H  | 2.08526841  | 3.002167266  | -0.11168768  |
| H  | -5.98333638 | 7.579580969 | 0.63501446  | H  | 0.53859039  | 2.519172582  | 0.616531531  |
| C  | -6.91587182 | 8.58104219  | 3.83784296  | C  | 1.67504137  | 1.858815111  | -2.603527557 |
| H  | -6.39450512 | 8.899179955 | 4.751483007 | H  | 1.28877455  | 1.983460006  | -3.624017684 |
| H  | -7.47097816 | 7.659987394 | 4.075384693 | H  | 2.5738138   | 2.489511884  | -2.513432872 |
| H  | -7.65044318 | 9.361124588 | 3.580308873 | H  | 1.98534347  | 0.80865346   | -2.4802209   |
| C  | -1.61066657 | 11.06494387 | 2.679574485 | C  | -4.04372887 | 1.277441204  | -3.358762254 |
| H  | -1.28389898 | 10.15536116 | 3.2029857   | H  | -3.76052992 | 2.136266686  | -3.980882037 |
| C  | -0.77699157 | 11.17722593 | 1.403567367 | C  | -5.21254524 | 1.723430267  | -2.480532362 |
| H  | -0.92763632 | 10.30134131 | 0.755207282 | H  | -4.91325052 | 2.551677131  | -1.823705727 |
| H  | 0.29515837  | 11.24259988 | 1.64405765  | H  | -6.05443866 | 2.070386011  | -3.099715569 |
| H  | -1.0447178  | 12.07604876 | 0.825118161 | H  | -5.57618559 | 0.896115855  | -1.849812523 |
| C  | -1.37032328 | 12.25977817 | 3.601715494 | C  | -4.45948292 | 0.133026886  | -4.282350578 |
| H  | -1.64774395 | 13.20822994 | 3.114241136 | H  | -4.81610282 | -0.740447758 | -3.71376618  |
| H  | -0.30665432 | 12.32657197 | 3.879308066 | H  | -5.28062927 | 0.452413134  | -4.94287743  |
| H  | -1.95844224 | 12.18287199 | 4.528511893 | H  | -3.6269345  | -0.20725347  | -4.916580165 |
| C  | -2.38630292 | 4.551357025 | 3.330870959 | C  | -0.62844324 | 6.93166452   | -3.363630723 |
| C  | -3.47741347 | 3.930521675 | 2.673900122 | C  | 0.61460446  | 7.083662308  | -2.708958033 |
| C  | -3.31834999 | 2.62163288  | 2.209125235 | C  | 0.91621191  | 8.318151419  | -2.124049639 |
| H  | -4.13916199 | 2.13322046  | 1.6833246   | H  | 1.87292734  | 8.446453242  | -1.612249059 |
| C  | -2.12366569 | 1.931081818 | 2.384188246 | C  | 0.0182373   | 9.374204157  | -2.16500608  |
| H  | -2.01922564 | 0.915629331 | 1.996857964 | H  | 0.26438037  | 10.32567489  | -1.6882826   |
| C  | -1.06192606 | 2.555103354 | 3.021175399 | C  | -1.20267135 | 9.21130827   | -2.811288113 |
| H  | -0.11700897 | 2.019743373 | 3.141968096 | H  | -1.90755839 | 10.04312182  | -2.834580698 |
| C  | -1.16291118 | 3.86889281  | 3.492812394 | C  | -1.55022547 | 8.002889318  | -3.421481114 |
| C  | -4.78419479 | 4.667896134 | 2.455728806 | C  | 1.64484451  | 5.971987984  | -2.626671178 |
| H  | -4.50960899 | 5.707741652 | 2.2022308   | H  | 1.18736786  | 5.05559049   | -3.029700385 |
| C  | -5.59129446 | 4.118370486 | 1.28556753  | C  | 2.06416904  | 5.683399024  | -1.186833775 |
| H  | -4.97793978 | 4.042171539 | 0.375462413 | H  | 1.20125581  | 5.414929383  | -0.558202112 |

|   |             |             |             |   |             |             |              |
|---|-------------|-------------|-------------|---|-------------|-------------|--------------|
| H | -6.43790815 | 4.783416029 | 1.063627481 | H | 2.78378248  | 4.851263959 | -1.157106975 |
| H | -6.00819794 | 3.122394403 | 1.5028933   | H | 2.55064199  | 6.554638065 | -0.722203478 |
| C | -5.64390902 | 4.712687899 | 3.721077814 | C | 2.87810598  | 6.296800039 | -3.473751076 |
| H | -6.60025821 | 5.218645966 | 3.516686463 | H | 3.57822513  | 5.446461431 | -3.482255067 |
| H | -5.15476839 | 5.258088384 | 4.539029671 | H | 2.61445644  | 6.533777107 | -4.513377303 |
| H | -5.87214843 | 3.694301882 | 4.074075039 | H | 3.41560317  | 7.167148763 | -3.064715999 |
| C | 0.06336739  | 4.51704516  | 4.102991915 | C | -2.87869711 | 7.861442293 | -4.141785722 |
| H | -0.22689796 | 5.517239021 | 4.452149342 | H | -3.23156017 | 6.835629774 | -3.95301987  |
| C | 1.14510194  | 4.705057184 | 3.039758958 | C | -3.95451501 | 8.814786158 | -3.632160882 |
| H | 1.5228591   | 3.734579977 | 2.680861086 | H | -3.7368927  | 9.863650794 | -3.891573047 |
| H | 1.99899232  | 5.267889176 | 3.448167152 | H | -4.92190476 | 8.564699634 | -4.093112036 |
| H | 0.7505123   | 5.256651292 | 2.176330026 | H | -4.0713122  | 8.747216338 | -2.54000286  |
| C | 0.61310783  | 3.730448546 | 5.293194001 | C | -2.70773505 | 8.023867323 | -5.653726299 |
| H | -0.15014068 | 3.554084862 | 6.065905716 | H | -2.04360907 | 7.260133877 | -6.077836366 |
| H | 1.44904494  | 4.275299842 | 5.758914086 | H | -3.68081646 | 7.935086707 | -6.161870254 |
| H | 0.99674411  | 2.74572384  | 4.982788273 | H | -2.2867641  | 9.013232224 | -5.896951442 |
| C | 0.68152549  | 7.984944222 | 1.712917182 | C | -5.08502856 | 5.276335311 | -2.645782806 |
| H | 1.06744957  | 9.025188293 | 1.667267054 | H | -5.99290506 | 4.643601162 | -2.733043218 |
| H | 0.23590859  | 7.758377367 | 0.73166851  | H | -4.84890126 | 5.367032912 | -1.574837653 |
| H | 1.57207102  | 7.330615824 | 1.825422444 | H | -5.3745711  | 6.290080479 | -2.998919882 |
| C | 0.24810302  | 8.115326642 | 4.061541997 | C | -4.24486815 | 4.562967146 | -4.767691106 |
| H | 1.14572653  | 7.512134932 | 4.319414252 | H | -4.47538435 | 5.52278992  | -5.28285926  |
| H | -0.50002356 | 7.937667576 | 4.849912136 | H | -3.38419543 | 4.119770833 | -5.292489388 |
| H | 0.56330681  | 9.180291991 | 4.149027681 | H | -5.11864843 | 3.900455323 | -4.948614411 |

**Table S8.** Cartesian coordinates of [L(Et<sub>2</sub>N)GaBi]<sub>2</sub> [Å] for the optimized geometry.

|    |             |             |             |    |             |             |             |
|----|-------------|-------------|-------------|----|-------------|-------------|-------------|
| Bi | -0.09238185 | -0.33990564 | 1.34046818  | Bi | 0.09301410  | 0.33874549  | -1.33993510 |
| Ga | 2.56392709  | -0.10043865 | 1.52796859  | Ga | -2.56326763 | 0.09920268  | -1.52763182 |
| N  | 3.06136449  | -0.99797020 | 3.24364338  | N  | -3.06056490 | 0.99665014  | -3.24341698 |
| N  | 3.74685199  | -1.28062775 | 0.40483184  | N  | -3.74629638 | 1.27936749  | -0.40464783 |
| N  | 3.36885424  | 1.59512973  | 1.46569858  | N  | -3.36825657 | -1.59635064 | -1.46542027 |
| C  | 4.30110419  | -1.45354814 | 3.39693325  | C  | -4.30026316 | 1.45229974  | -3.39680625 |
| C  | 5.16494565  | -1.71202479 | 2.31973138  | C  | -5.16418001 | 1.71083204  | -2.31967745 |
| H  | 6.15955420  | -2.06760889 | 2.58777654  | H  | -6.15875866 | 2.06644175  | -2.58780917 |
| C  | 4.84939982  | -1.78511447 | 0.94597795  | C  | -4.84879212 | 1.78386214  | -0.94588911 |
| C  | 4.81389836  | -1.73561229 | 4.78253193  | C  | -4.81295522 | 1.73431988  | -4.78245214 |
| H  | 5.82807681  | -2.15133246 | 4.75685575  | H  | -5.82705207 | 2.15024377  | -4.75685952 |
| H  | 4.15197724  | -2.43367316 | 5.31443077  | H  | -4.15087415 | 2.43217743  | -5.31441496 |
| H  | 4.82055415  | -0.80829262 | 5.37416352  | H  | -4.81978692 | 0.80692715  | -5.37396875 |
| C  | 5.84907410  | -2.52465821 | 0.09570855  | C  | -5.84871516 | 2.52317188  | -0.09569354 |
| H  | 5.83222043  | -3.59506692 | 0.34892388  | H  | -5.83343399 | 3.59330596  | -0.35008258 |
| H  | 6.86172941  | -2.15854160 | 0.31803376  | H  | -6.86105993 | 2.15552961  | -0.31692481 |
| H  | 5.65262187  | -2.41868811 | -0.97719606 | H  | -5.65146176 | 2.41847917  | 0.97717849  |
| C  | 2.14668010  | -1.04020517 | 4.33697543  | C  | -2.14578084 | 1.03880864  | -4.33666860 |
| C  | 1.97495687  | 0.07037053  | 5.18948578  | C  | -1.97403192 | -0.07180491 | -5.18912105 |
| C  | 1.14369161  | -0.06315730 | 6.30723239  | C  | -1.14262529 | 0.06162879  | -6.30677351 |
| H  | 1.02468569  | 0.78672476  | 6.98403547  | H  | -1.02360098 | -0.78828407 | -6.98353150 |
| C  | 0.46250057  | -1.24318462 | 6.56453909  | C  | -0.46132209 | 1.24159808  | -6.56404238 |
| H  | -0.17386866 | -1.33321132 | 7.44808630  | H  | 0.17516298  | 1.33154933  | -7.44751330 |
| C  | 0.56269136  | -2.29790085 | 5.66406727  | C  | -0.56155637 | 2.29635553  | -5.66362626 |
| H  | -0.02060581 | -3.20298600 | 5.83859970  | H  | 0.02182110  | 3.20139526  | -5.83812268 |
| C  | 1.37938251  | -2.21475445 | 4.53374989  | C  | -1.37838940 | 2.21330578  | -4.53340576 |
| C  | 2.60660837  | 1.41859683  | 4.91239905  | C  | -2.60581420 | -1.41997627 | -4.91207268 |
| H  | 3.14665416  | 1.34351367  | 3.95812786  | H  | -3.14595502 | -1.34482911 | -3.95786026 |
| C  | 3.59969457  | 1.83810398  | 5.99424517  | C  | -3.59881183 | -1.83943041 | -5.99401777 |
| H  | 4.06172438  | 2.80497954  | 5.74160288  | H  | -4.06094320 | -2.80626469 | -5.74140782 |
| H  | 4.41078908  | 1.10429146  | 6.11355723  | H  | -4.40983706 | -1.10556027 | -6.11343516 |
| H  | 3.10739568  | 1.94878882  | 6.97385062  | H  | -3.10641088 | -1.95017042 | -6.97356572 |
| C  | 1.51921807  | 2.48001581  | 4.73174412  | C  | -1.51852468 | -2.48147310 | -4.73127950 |



|   |             |             |             |   |             |             |             |
|---|-------------|-------------|-------------|---|-------------|-------------|-------------|
| H | 1.96233928  | 3.44308076  | 4.43674091  | H | -1.96175048 | -3.44449085 | -4.43628506 |
| H | 0.95440029  | 2.64384802  | 5.66366741  | H | -0.95363365 | -2.64538687 | -5.66314401 |
| H | 0.79926917  | 2.18387028  | 3.95376636  | H | -0.79862237 | -2.18535719 | -3.95324951 |
| C | 1.39037554  | -3.34793102 | 3.52206618  | C | -1.38945658 | 3.34654435  | -3.52179430 |
| H | 1.58237798  | -2.87934104 | 2.54155950  | H | -1.58157738 | 2.87801671  | -2.54128028 |
| C | 2.50737049  | -4.36445828 | 3.76336837  | C | -2.50639011 | 4.36309583  | -3.76327484 |
| H | 2.44216856  | -5.18540581 | 3.03163421  | H | -2.44122431 | 5.18409036  | -3.03159177 |
| H | 2.42706447  | -4.80465657 | 4.77050463  | H | -2.42596568 | 4.80322031  | -4.77043368 |
| H | 3.50477822  | -3.91585727 | 3.66208995  | H | -3.50382674 | 3.91454667  | -3.66206020 |
| C | 0.03773122  | -4.05160192 | 3.44047025  | C | -0.03680304 | 4.05018406  | -3.44008501 |
| H | 0.02352875  | -4.76145361 | 2.60283026  | H | -0.02266718 | 4.76005037  | -2.60245835 |
| H | -0.78179509 | -3.33349583 | 3.28593661  | H | 0.78269247  | 3.33206573  | -3.28545669 |
| H | -0.18209085 | -4.62878652 | 4.35186691  | H | 0.18312136  | 4.62734257  | -4.35147343 |
| C | 3.37134408  | -1.60711199 | -0.93736610 | C | -3.37075934 | 1.60588017  | 0.93753566  |
| C | 3.55082075  | -0.66575996 | -1.98077734 | C | -3.55019159 | 0.66458132  | 1.98099809  |
| C | 3.11967365  | -1.00488578 | -3.26655615 | C | -3.11897921 | 1.00377450  | 3.26673979  |
| H | 3.24223075  | -0.28537888 | -4.07646148 | H | -3.24152096 | 0.28431544  | 4.07669096  |
| C | 2.51877768  | -2.22885178 | -3.53550114 | C | -2.51806812 | 2.22775409  | 3.53559464  |
| H | 2.17685436  | -2.46371433 | -4.54605748 | H | -2.17611894 | 2.46267786  | 4.54612946  |
| C | 2.34764292  | -3.14139034 | -2.50600695 | C | -2.34695901 | 3.14023404  | 2.50604212  |
| H | 1.87043547  | -4.10219034 | -2.71317705 | H | -1.86973834 | 4.10104332  | 2.71314090  |
| C | 2.76416911  | -2.85431613 | -1.20140648 | C | -2.76353418 | 2.85308373  | 1.20147523  |
| C | 4.21136860  | 0.67798078  | -1.74059406 | C | -4.21078852 | -0.67915512 | 1.74092330  |
| H | 3.89188902  | 1.01388913  | -0.74142756 | H | -3.89139313 | -1.01511182 | 0.74174574  |
| C | 5.73672911  | 0.55469752  | -1.73681486 | C | -5.73614338 | -0.55581656 | 1.73725265  |
| H | 6.20134601  | 1.53774952  | -1.56347010 | H | -6.20081536 | -1.53884035 | 1.56388730  |
| H | 6.09977233  | 0.17177308  | -2.70470488 | H | -6.09910558 | -0.17291957 | 2.70518414  |
| H | 6.09600668  | -0.12172441 | -0.95085994 | H | -6.09542898 | 0.12067209  | 0.95136257  |
| C | 3.78456915  | 1.74867965  | -2.73938342 | C | -3.78395039 | -1.74982528 | 2.73972898  |
| H | 2.68904635  | 1.81404363  | -2.82266103 | H | -2.68842321 | -1.81523485 | 2.82292615  |
| H | 4.19137297  | 1.56302466  | -3.74631460 | H | -4.19066920 | -1.56410328 | 3.74668265  |
| H | 4.15800051  | 2.73154608  | -2.41724493 | H | -4.15744998 | -2.73269278 | 2.41766867  |
| C | 2.53279005  | -3.90436668 | -0.13265990 | C | -2.53225764 | 3.90306801  | 0.13264400  |
| H | 2.86519974  | -3.48925656 | 0.83022134  | H | -2.86431466 | 3.48770875  | -0.83024889 |
| C | 3.34356438  | -5.17351155 | -0.40301185 | C | -3.34358541 | 5.17192941  | 0.40265333  |
| H | 4.41336283  | -4.95884167 | -0.53428253 | H | -4.41334884 | 4.95685229  | 0.53351620  |
| H | 2.99551731  | -5.67928882 | -1.31764524 | H | -2.99605836 | 5.67784136  | 1.31741093  |
| H | 3.23726056  | -5.88532547 | 0.43075262  | H | -3.23723625 | 5.88376136  | -0.43109103 |
| C | 1.04859552  | -4.23791947 | -0.00874434 | C | -1.04815935 | 4.23712556  | 0.00897393  |
| H | 0.88642299  | -5.00670889 | 0.76053330  | H | -0.88611081 | 5.00580006  | -0.76044616 |
| H | 0.64435648  | -4.63086653 | -0.95440463 | H | -0.64422641 | 4.63043736  | 0.95461324  |
| H | 0.45804919  | -3.34891205 | 0.25646814  | H | -0.45725854 | 3.34826368  | -0.25593939 |
| C | 4.80024204  | 1.78530640  | 1.45545960  | C | -4.79965239 | -1.78646194 | -1.45521361 |
| H | 5.08119345  | 2.56505278  | 0.71808143  | H | -5.08066592 | -2.56616595 | -0.71781405 |
| H | 5.28312938  | 0.86429564  | 1.09292908  | H | -5.28251251 | -0.86541783 | -1.09273247 |
| C | 5.42819282  | 2.14946424  | 2.79845965  | C | -5.42757286 | -2.15064721 | -2.79821906 |
| H | 6.50095132  | 2.37253347  | 2.68079245  | H | -6.50034774 | -2.37365450 | -2.68058303 |
| H | 5.33531298  | 1.32068134  | 3.51556628  | H | -5.33461778 | -1.32190351 | -3.51536089 |
| H | 4.95082042  | 3.03642365  | 3.24309960  | H | -4.95023135 | -3.03765295 | -3.24279766 |
| C | 2.58138975  | 2.80438065  | 1.44681773  | C | -2.58085036 | -2.80563522 | -1.44643840 |
| H | 2.91945773  | 3.50958836  | 2.23458269  | H | -2.91893139 | -3.51087607 | -2.23416703 |
| H | 1.54050200  | 2.55176085  | 1.71358945  | H | -1.53994679 | -2.55307789 | -1.71320402 |
| C | 2.56093731  | 3.54010169  | 0.11180495  | C | -2.56046484 | -3.54128071 | -0.11138327 |
| H | 2.00379739  | 4.48690772  | 0.19043548  | H | -2.00338648 | -4.48812718 | -0.18995074 |
| H | 2.07867798  | 2.92258880  | -0.66144709 | H | -2.07817994 | -2.92375763 | 0.66184402  |
| H | 3.57624061  | 3.78251426  | -0.23792680 | H | -3.57578950 | -3.78361110 | 0.23834239  |

**Table S9.** Cartesian coordinates of [L(Me<sub>2</sub>N)GaSb]<sub>2</sub><sup>-3</sup>. [Å] for the optimized geometry.

|    |              |             |             |    |              |              |              |
|----|--------------|-------------|-------------|----|--------------|--------------|--------------|
| Sb | -3.122680322 | 7.131654146 | 0.05273982  | Sb | -1.901429282 | 4.69815312   | -0.162183704 |
| Ga | -2.197089361 | 7.346383863 | 2.433456398 | Ga | -2.210124628 | 4.577069263  | -2.700063905 |
| N  | -3.252632516 | 8.716139897 | 3.493544151 | N  | -1.491129792 | 2.835102213  | -3.450912463 |
| N  | -2.523328523 | 5.945853615 | 3.881585023 | N  | -0.890209876 | 5.652008318  | -3.851611734 |
| N  | -0.382786087 | 7.811558978 | 2.699116623 | N  | -3.870932083 | 4.796812227  | -3.575740666 |
| C  | -3.30006832  | 8.709378847 | 4.819527094 | C  | -0.965534781 | 2.743239517  | -4.666733479 |
| C  | -2.969212391 | 7.589388815 | 5.597701866 | C  | -0.540497649 | 3.849439371  | -5.417725162 |
| H  | -3.030894325 | 7.719866804 | 6.677181725 | H  | -0.14033279  | 3.629471128  | -6.407415846 |
| C  | -2.714566917 | 6.275269851 | 5.149189047 | C  | -0.38683577  | 5.183351132  | -4.978145532 |
| C  | -3.734642875 | 9.956407829 | 5.544995705 | C  | -0.788088005 | 1.381577877  | -5.287076273 |
| H  | -3.01356407  | 10.76469371 | 5.34770955  | H  | -1.769931283 | 0.921026788  | -5.472017131 |
| H  | -3.794265795 | 9.789040182 | 6.627327921 | H  | -0.242405504 | 1.445526111  | -6.236294653 |
| H  | -4.706899649 | 10.31585955 | 5.181531644 | H  | -0.251508711 | 0.704998458  | -4.606637818 |
| C  | -2.674212891 | 5.202092439 | 6.206013737 | C  | 0.449449733  | 6.061617301  | -5.876112031 |
| H  | -3.277484564 | 4.333407532 | 5.907232795 | H  | 0.446565907  | 7.1101201    | -5.556652613 |
| H  | -3.036200139 | 5.582975743 | 7.168627266 | H  | 1.488988914  | 5.702053603  | -5.889093695 |
| H  | -1.645350345 | 4.836110198 | 6.335757789 | H  | 0.072013736  | 5.99523039   | -6.907354818 |
| C  | -3.951127644 | 9.722073296 | 2.774072709 | C  | -1.677470676 | 1.661760411  | -2.668008261 |
| C  | -5.341952378 | 9.559958786 | 2.57218568  | C  | -0.669928771 | 1.296002028  | -1.744035355 |
| C  | -6.045846508 | 10.57106635 | 1.91475322  | C  | -0.842478713 | 0.127138372  | -0.998744458 |
| H  | -7.122579416 | 10.45961416 | 1.763512901 | H  | -0.073267361 | -0.168352657 | -0.283576915 |
| C  | -5.399457477 | 11.70404317 | 1.432446726 | C  | -1.983655441 | -0.656830881 | -1.133578758 |
| H  | -5.966400602 | 12.48563886 | 0.92012224  | H  | -2.097700099 | -1.567605752 | -0.539816627 |
| C  | -4.022914179 | 11.81799146 | 1.578283983 | C  | -2.988518936 | -0.256734139 | -2.003261825 |
| H  | -3.506997493 | 12.68900092 | 1.165425513 | H  | -3.904035938 | -0.849313602 | -2.080989294 |
| C  | -3.275639248 | 10.8348612  | 2.234903903 | C  | -2.862161107 | 0.90442476   | -2.772447406 |
| C  | -6.073836257 | 8.31056708  | 3.027537377 | C  | 0.562514403  | 2.159854409  | -1.544801385 |
| H  | -5.30760881  | 7.582585969 | 3.331117884 | H  | 0.233807376  | 3.201905604  | -1.696987227 |
| C  | -6.86686621  | 7.683223664 | 1.882804217 | C  | 1.113779878  | 2.07445968   | -0.125706216 |
| H  | -7.670292143 | 8.347840171 | 1.52634017  | H  | 1.559032263  | 1.088996796  | 0.089620906  |
| H  | -7.340126155 | 6.746449529 | 2.21518993  | H  | 1.902371643  | 2.826574835  | 0.016599562  |
| H  | -6.203108039 | 7.450495225 | 1.035276586 | H  | 0.324934439  | 2.278433138  | 0.613596611  |
| C  | -6.970822519 | 8.573364357 | 4.237700912 | C  | 1.655886097  | 1.867647802  | -2.573381326 |
| H  | -6.397465795 | 8.941269741 | 5.100936414 | H  | 1.324037846  | 2.083002585  | -3.598577692 |
| H  | -7.480493236 | 7.647125992 | 4.54770458  | H  | 2.540771489  | 2.49443833   | -2.377631542 |
| H  | -7.745680279 | 9.322073338 | 4.003243309 | H  | 1.971735186  | 0.811952131  | -2.526513851 |
| C  | -1.769858133 | 10.97797892 | 2.316271535 | C  | -4.026141998 | 1.353464395  | -3.630508944 |
| H  | -1.379630694 | 10.07994904 | 2.817529264 | H  | -3.697963009 | 2.236767316  | -4.194163474 |
| C  | -1.16227983  | 11.00515551 | 0.913365603 | C  | -5.18193954  | 1.80396988   | -2.736973462 |
| H  | -1.426046054 | 10.09259177 | 0.356441867 | H  | -4.844267866 | 2.572294515  | -2.027422376 |
| H  | -0.064534991 | 11.06378891 | 0.968596547 | H  | -5.995366113 | 2.234394016  | -3.341299356 |
| H  | -1.517896262 | 11.87358832 | 0.334539115 | H  | -5.592926277 | 0.958061147  | -2.161434147 |
| C  | -1.349888821 | 12.20112844 | 3.130238016 | C  | -4.483234593 | 0.288034302  | -4.625291665 |
| H  | -1.688523426 | 13.13850442 | 2.658306197 | H  | -4.881954058 | -0.603677481 | -4.114718342 |
| H  | -0.252592756 | 12.24800882 | 3.216826482 | H  | -5.284864435 | 0.684519447  | -5.268596304 |
| H  | -1.768044295 | 12.17422307 | 4.148509857 | H  | -3.661465003 | -0.046964165 | -5.277276936 |
| C  | -2.398324083 | 4.568465566 | 3.526337358 | C  | -0.482847319 | 6.916992638  | -3.334694546 |
| C  | -3.5298476   | 3.89666786  | 3.010087514 | C  | 0.752656867  | 7.023592849  | -2.659781567 |
| C  | -3.408399712 | 2.545076074 | 2.680168236 | C  | 1.110623468  | 8.258426295  | -2.110691462 |
| H  | -4.267439788 | 2.017262861 | 2.264520767 | H  | 2.058770663  | 8.34792645   | -1.574361092 |
| C  | -2.201683357 | 1.870204633 | 2.823940868 | C  | 0.275815662  | 9.362098343  | -2.211966387 |
| H  | -2.123188881 | 0.820176776 | 2.531704467 | H  | 0.563136244  | 10.31386203  | -1.758964432 |
| C  | -1.087789221 | 2.554166848 | 3.290696224 | C  | -0.94387458  | 9.239982676  | -2.866887016 |
| H  | -0.128261556 | 2.035723165 | 3.365054752 | H  | -1.60979162  | 10.10235458  | -2.920527287 |
| C  | -1.158997719 | 3.905489383 | 3.642857732 | C  | -1.34947709  | 8.028878632  | -3.43188967  |
| C  | -4.840640948 | 4.627712556 | 2.790447536 | C  | 1.705007908  | 5.852548877  | -2.501552307 |
| H  | -4.569905418 | 5.65527986  | 2.491640371 | H  | 1.216658939  | 4.963519318  | -2.927865895 |
| C  | -5.655587721 | 4.047121746 | 1.640247601 | C  | 1.991303329  | 5.556481563  | -1.031170188 |
| H  | -5.034666812 | 3.963029253 | 0.734663262 | H  | 1.057776497  | 5.341201687  | -0.487573341 |

|   |              |             |             |   |              |             |              |
|---|--------------|-------------|-------------|---|--------------|-------------|--------------|
| H | -6.501571878 | 4.71051663  | 1.408165711 | H | 2.661487796  | 4.68735784  | -0.938133435 |
| H | -6.071410104 | 3.054664367 | 1.88044266  | H | 2.483523763  | 6.407937577 | -0.535629743 |
| C | -5.672644472 | 4.706728074 | 4.071550173 | C | 3.01198545   | 6.084249669 | -3.263355094 |
| H | -6.63414224  | 5.207875559 | 3.877526704 | H | 3.653442364  | 5.189368224 | -3.21329828  |
| H | -5.160812692 | 5.274591887 | 4.861592031 | H | 2.836732097  | 6.321195681 | -4.322583565 |
| H | -5.891861664 | 3.698199553 | 4.460297346 | H | 3.577763339  | 6.923839822 | -2.827770291 |
| C | 0.108678162  | 4.62277483  | 4.060585351 | C | -2.680850799 | 7.925486794 | -4.151842546 |
| H | -0.169355432 | 5.64513184  | 4.34898071  | H | -3.050150213 | 6.901620116 | -3.98303165  |
| C | 1.061533411  | 4.737662439 | 2.871445709 | C | -3.737091074 | 8.884734641 | -3.61305097  |
| H | 1.438157107  | 3.747659769 | 2.567692518 | H | -3.504861255 | 9.936669905 | -3.850222684 |
| H | 1.926697889  | 5.36978189  | 3.126494257 | H | -4.713161441 | 8.658288574 | -4.069221399 |
| H | 0.550434155  | 5.181805583 | 2.006588094 | H | -3.839057363 | 8.788430144 | -2.521143603 |
| C | 0.806495846  | 3.958622994 | 5.247169833 | C | -2.508543662 | 8.11517215  | -5.660559142 |
| H | 0.141074362  | 3.852391289 | 6.118031022 | H | -1.859319171 | 7.345345004 | -6.098775853 |
| H | 1.680153218  | 4.553277992 | 5.558831377 | H | -3.483535141 | 8.055818628 | -6.170357612 |
| H | 1.17029638   | 2.950975897 | 4.988715416 | H | -2.066273432 | 9.100803846 | -5.884323107 |
| C | 0.515826833  | 7.991299402 | 1.600151699 | C | -5.025967753 | 5.295972256 | -2.89289917  |
| H | 0.862034298  | 9.044279394 | 1.497581496 | H | -5.925149713 | 4.669268271 | -3.080970738 |
| H | 0.032349071  | 7.709237585 | 0.652073764 | H | -4.856023324 | 5.319156985 | -1.805172356 |
| H | 1.434664831  | 7.374248596 | 1.702107149 | H | -5.297666867 | 6.330864686 | -3.19963864  |
| C | 0.178683619  | 8.196424963 | 3.95319953  | C | -4.050745473 | 4.696549392 | -4.988892182 |
| H | 1.119905385  | 7.646227751 | 4.18457944  | H | -4.288663553 | 5.67432726  | -5.470329531 |
| H | -0.518801963 | 8.010974892 | 4.783500533 | H | -3.147322171 | 4.309642201 | -5.483779271 |
| H | 0.448595373  | 9.280077285 | 3.994834551 | H | -4.892303129 | 4.016581719 | -5.258243012 |

**Table S10.** Cartesian coordinates of [L(Et<sub>2</sub>N)GaBi]<sub>2</sub><sup>-</sup> **4**. [Å] for the optimized geometry.

|    |             |             |             |   |             |             |             |
|----|-------------|-------------|-------------|---|-------------|-------------|-------------|
| Bi | 1.98166003  | 3.85987069  | 10.17867004 | H | 2.30052511  | 3.00036734  | 5.32354455  |
| Bi | 3.10565550  | 6.51002283  | 9.92866696  | H | 5.19570218  | 8.62805159  | 13.36900844 |
| Ga | 3.88673060  | 3.21055727  | 11.88814603 | C | 3.11471791  | 8.32961781  | 13.80916864 |
| Ga | 1.86064872  | 6.77891806  | 7.61782889  | H | 6.08907277  | 5.05339126  | 12.82930426 |
| N  | 3.96293196  | 4.19702321  | 13.69926284 | C | 7.07661600  | 6.22903046  | 14.33276849 |
| N  | 3.50479514  | 1.45193228  | 12.78955771 | C | 6.69617325  | 6.90280592  | 11.95341572 |
| N  | 5.72858069  | 3.09463694  | 11.43175667 | H | 1.07538134  | 7.74065323  | 14.12968041 |
| N  | -0.17696627 | 6.95737468  | 7.53097402  | H | 1.53142355  | 4.12671682  | 13.51827466 |
| N  | 2.11305202  | 8.69974918  | 6.96453428  | C | 1.01932434  | 4.63212982  | 15.54029091 |
| N  | 2.21336728  | 5.69175648  | 6.10066952  | C | -0.06977453 | 5.51602938  | 13.44626372 |
| C  | 4.35471371  | 3.56204181  | 14.78324967 | H | 2.59685952  | -1.85266870 | 9.70060609  |
| C  | 3.68849615  | 5.59608243  | 13.71777584 | C | 1.01500434  | -1.52080978 | 11.11480857 |
| C  | 4.03166630  | 1.18088277  | 13.98531261 | H | 4.80511696  | 0.96576834  | 10.73662705 |
| C  | 2.66310660  | 0.48575643  | 12.17599313 | C | 5.45345368  | -1.07289143 | 10.72909023 |
| C  | 6.21973549  | 3.85476219  | 10.30511948 | C | 4.26172830  | 0.12848904  | 8.86055723  |
| C  | 6.67772425  | 2.17758740  | 12.00221668 | H | -0.43459101 | -0.89266257 | 12.57413950 |
| C  | -0.75150632 | 7.79546655  | 6.68419550  | H | 1.52234025  | 1.95939730  | 14.00084234 |
| C  | -0.95770359 | 6.21054885  | 8.46372828  | C | 0.43805968  | 0.45119935  | 15.05881184 |
| C  | 1.25169828  | 9.23174458  | 6.10717564  | C | -0.46193634 | 1.91009161  | 13.21593906 |
| C  | 3.28368457  | 9.43092132  | 7.30973025  | H | -2.10122093 | 3.06051945  | 9.07157272  |
| C  | 1.45957755  | 5.72136507  | 4.87503030  | C | -2.41785105 | 4.74999782  | 10.35491753 |
| C  | 3.32520784  | 4.77075289  | 6.11946948  | H | 0.27520156  | 4.56598233  | 6.75455034  |
| C  | 4.52346240  | 2.15603544  | 14.85837771 | C | -1.65048955 | 4.35159442  | 5.82963539  |
| C  | 4.62678569  | 4.30116636  | 16.07128009 | C | -0.47882060 | 2.62480802  | 7.20370134  |
| C  | 4.71844119  | 6.53252787  | 13.47816867 | H | -2.54611341 | 6.58942946  | 11.45603098 |
| C  | 2.35802182  | 6.02453944  | 13.92139150 | H | -0.57506896 | 8.72327883  | 9.10640719  |
| C  | 4.09579476  | -0.25317149 | 14.44614054 | C | -2.50890267 | 9.11361681  | 9.94126181  |
| C  | 3.09352328  | -0.25565873 | 11.05389590 | C | -0.43900777 | 8.50710478  | 11.22428470 |
| C  | 1.36140389  | 0.28835464  | 12.69645023 | H | 6.50779901  | 9.96455497  | 6.34875518  |
| H  | 7.24980730  | 4.21657118  | 10.50441649 | C | 5.48422099  | 11.06644104 | 7.88390095  |
| H  | 5.60779413  | 4.76506363  | 10.18872294 | H | 3.75913137  | 7.55114454  | 5.56720705  |
| C  | 6.19603190  | 3.12176612  | 8.96842524  | C | 5.02066615  | 8.63213104  | 4.20974335  |
| H  | 7.25676027  | 1.66642462  | 11.20223902 | C | 5.78332253  | 7.17614140  | 6.11980463  |

|   |             |             |             |   |             |             |             |
|---|-------------|-------------|-------------|---|-------------|-------------|-------------|
| H | 6.14352061  | 1.36916936  | 12.52840000 | H | 4.27454132  | 11.88836938 | 9.45587311  |
| C | 7.66923266  | 2.80094472  | 12.98495781 | H | 1.56058371  | 9.39745309  | 9.27577512  |
| C | -0.05067678 | 8.74360836  | 5.90731984  | C | 0.93422964  | 11.38689124 | 8.79553424  |
| C | -2.25131902 | 7.81527228  | 6.51689159  | C | 2.38345847  | 10.70731133 | 10.73833412 |
| C | -1.19398145 | 4.83080442  | 8.25384997  | H | 2.89025573  | 9.39845298  | 13.84585123 |
| C | -1.44412580 | 6.85052897  | 9.62459620  | H | 8.09181443  | 5.90085908  | 14.05803573 |
| C | 1.65639911  | 10.44923863 | 5.31547080  | H | 6.74734379  | 5.61786224  | 15.18327240 |
| C | 4.49529203  | 9.24754669  | 6.61133629  | H | 7.14105842  | 7.27444531  | 14.67860878 |
| C | 3.21796570  | 10.34612747 | 8.38768676  | H | 6.00368949  | 6.89509180  | 11.09818645 |
| H | 0.46728693  | 6.15576265  | 5.06997246  | H | 7.65138130  | 6.46445942  | 11.62526297 |
| H | 1.25686092  | 4.68986592  | 4.51556869  | H | 6.89293195  | 7.95438096  | 12.22009508 |
| C | 2.09246610  | 6.50317233  | 3.72347059  | H | 0.76725904  | 5.51392774  | 16.15257218 |
| H | 3.93419114  | 4.98803283  | 7.01293182  | H | 1.91804495  | 4.16930287  | 15.97054438 |
| C | 2.95229619  | 3.29202649  | 6.16324176  | H | 0.19419984  | 3.90807858  | 15.63483301 |
| H | 3.99683534  | 4.93916290  | 5.24934857  | H | 0.09214753  | 5.77675768  | 12.39058160 |
| H | 4.95610150  | 1.78749875  | 15.78870172 | H | -0.48667652 | 6.39083313  | 13.97127025 |
| H | 5.66630525  | 4.11836351  | 16.38341514 | H | -0.83214492 | 4.72512985  | 13.47779172 |
| H | 3.97923867  | 3.91269657  | 16.87106445 | H | 0.38384105  | -2.31786807 | 10.71352725 |
| H | 4.46702815  | 5.38131836  | 15.97803993 | H | 5.12413753  | -2.07025343 | 10.39200996 |
| C | 4.40672917  | 7.89421333  | 13.54807863 | H | 5.62408486  | -1.12548553 | 11.81488013 |
| C | 6.13455231  | 6.11051899  | 13.13417060 | H | 6.42113236  | -0.85380187 | 10.25054188 |
| C | 2.09905424  | 7.39593246  | 13.97557096 | H | 3.92301088  | -0.81190630 | 8.39642574  |
| C | 1.22724129  | 5.02644401  | 14.07782279 | H | 5.22185598  | 0.39784926  | 8.39679729  |
| H | 3.09126558  | -0.67907196 | 14.57275079 | H | 3.53533617  | 0.91785763  | 8.61323246  |
| H | 4.63752083  | -0.33864852 | 15.39605167 | H | -0.31706485 | -0.33414971 | 14.89056862 |
| H | 4.59541731  | -0.87199843 | 13.68609673 | H | 0.03004046  | 1.15034685  | 15.80616908 |
| C | 2.25945623  | -1.26165823 | 10.55518537 | H | 1.32532951  | -0.02582586 | 15.50035474 |
| C | 4.42370391  | -0.00048576 | 10.37382623 | H | -0.20719777 | 2.50390305  | 12.32391264 |
| C | 0.56628872  | -0.72965782 | 12.16509151 | H | -0.88100932 | 2.58964177  | 13.97345990 |
| C | 0.77156885  | 1.19189508  | 13.76406018 | H | -1.25292639 | 1.19508155  | 12.93811365 |
| H | 5.15545386  | 2.89562611  | 8.69089207  | H | -2.97301663 | 4.17414049  | 11.09959978 |
| H | 6.75859020  | 2.17467048  | 9.00852365  | H | -1.75178001 | 5.41603595  | 5.58195638  |
| H | 6.63310227  | 3.74292630  | 8.16878867  | H | -2.65619687 | 3.95942242  | 6.05757052  |
| H | 8.21419438  | 3.64026484  | 12.52471498 | H | -1.27889077 | 3.83690663  | 4.92954401  |
| H | 8.41441202  | 2.06072746  | 13.32376972 | H | -1.42728530 | 2.07638226  | 7.32882742  |
| H | 7.14276931  | 3.18452363  | 13.87142140 | H | 0.15681848  | 2.42399400  | 8.07964188  |
| H | -0.64799142 | 9.27637482  | 5.16740259  | H | 0.02509224  | 2.20524274  | 6.32018406  |
| H | -2.50118951 | 7.79080620  | 5.44597496  | H | -3.09248719 | 8.97838327  | 9.01931351  |
| H | -2.65937462 | 8.75295373  | 6.92231964  | H | -2.30546919 | 10.18983880 | 10.06317348 |
| H | -2.74198600 | 6.97540792  | 7.02216895  | H | -3.14626796 | 8.79872772  | 10.78346372 |
| C | -1.92628316 | 4.12756665  | 9.21374981  | H | 0.53879828  | 8.00045823  | 11.19015135 |
| C | -0.70057822 | 4.12063353  | 7.00726293  | H | -1.00381484 | 8.10080728  | 12.07735661 |
| C | -2.17641463 | 6.10150016  | 10.55059141 | H | -0.27330727 | 9.57722785  | 11.41980722 |
| C | -1.20138222 | 8.31944658  | 9.91520902  | H | 6.33348508  | 11.72265140 | 8.09107640  |
| H | 2.53529444  | 10.22105483 | 4.69472634  | H | 5.12859105  | 7.78735868  | 3.51154275  |
| H | 1.95737299  | 11.27052970 | 5.98180278  | H | 5.96415654  | 9.20232131  | 4.19260245  |
| H | 0.84019955  | 10.79300702 | 4.66849478  | H | 4.22905858  | 9.28815304  | 3.81619730  |
| C | 5.57299869  | 10.09113663 | 6.90124288  | H | 5.88977067  | 6.31363769  | 5.44479218  |
| C | 4.69560024  | 8.12622930  | 5.61342210  | H | 5.53116591  | 6.79602447  | 7.12183080  |
| C | 4.32045522  | 11.16622755 | 8.63887148  | H | 6.76190888  | 7.67968747  | 6.18323585  |
| C | 1.99956396  | 10.40886939 | 9.29153060  | H | 1.34425538  | 12.40677074 | 8.70501474  |
| H | 2.15070858  | 7.57506161  | 3.96252508  | H | 0.08927346  | 11.42473330 | 9.50209712  |
| H | 1.49686231  | 6.39491678  | 2.80113468  | H | 0.52946659  | 11.08987797 | 7.81783231  |
| H | 3.11199732  | 6.14885729  | 3.50629703  | H | 3.13998508  | 9.99384213  | 11.09806403 |
| H | 2.43196033  | 3.06285516  | 7.10567815  | H | 1.50477451  | 10.61608488 | 11.39159441 |
| H | 3.85632907  | 2.66302266  | 6.11626069  | H | 2.77440890  | 11.73000791 | 10.86327078 |

## References

- (1) G. M. Sheldrick, *Acta Crystallogr.* 1990, **A46**, 467
- (2) G. M. Sheldrick, SHELXL-2014, Program for the Refinement of Crystal Structures, Univ. of Göttingen, Göttingen (Germany), 2014. See also: G. M. Sheldrick, *Acta Crystallogr.* 2008, **A64**, 112–122.
- (3) C. B. Hübschle, G. M. Sheldrick and B. Dittrich, *J. Appl. Cryst.* 2011, **44**, 1281–1284.
- (4) For details see: A. L. Spek, *Acta Cryst.* 1990, **A46**, 194–201.
- (5) F. Neese, *WIREs Comput. Mol. Sci.* 2018, **8**, 1–6.
- (6) F. Neese, F. Wennmohs, U. Becker and C. Riplinger, *J. Chem. Phys.* 2020, **152**, 224108.
- (7) F. Neese, The ORCA program system. *WIREs Comput Mol Sci.* 2012, **2**, 73–78.
- (8) C. Adamo and V. Barone, *J. Chem. Phys.* 1999, **110**, 6158–6170.
- (9) F. Weigend and R. Ahlrichs, *PCCP* 2005, **7**, 3297–3305.
- (10) S. Grimme, S. Ehrlich and L. Goerigk, *J. Comput. Chem.* 2011, **32**, 1456–1465.
- (11) S. Grimme, J. Antony, S. Ehrlich and H. Krieg, *J. Chem. Phys.* 2010, **132**, 154104.
- (12) B. Metz, H. Stoll and M. Dolg, *J. Chem. Phys.* 2000, **113**, 2563–2569.
- (13) J. Zheng, X. Xu and D. G. Truhlar, *Theor. Chem. Ac.* 2011, **128**, 295–305.
- (14) F. Weigend, *PCCP* 2006, **8**, 1057–1065.
- (15) G. L. Stoychev, A. A. Auer and F. Neese, *J. Chem. Theory Comput.* 2017, **13**, 554–562.
- (16) E. D. Glendening, J. K. Badenhoop, A. E. Reed, J. E. Carpenter, J. A. Bohmann, C. M. Morales, C. R. Landis and F. Weinhold. *NBO 6.0.*; Theoretical Chemistry Institute, University of Wisconsin, Madison, WI, 2013. <https://nbo6.chem.wisc.edu/>
- (17) C. Kalaiarasi, M. S. Pavan and P. Kumaradhas, *Acta. Crystallogr. B* 2016, **72**, 775–786.
- (18) P. Kumar, V. Shayam, V. Raghavendra and V. Subramanian, *J. Chem. Sci.* 2016, **128**, 1527–1536.
- (19) R. F. W. Bader, *Chem. Rev.* 1991, **91**, 893–928.
- (20) B. Silvi and A. Savin, *Nature* 1994, **371**, 683–686.
- (21) A. D. Becke and K. E. Edgecombe, *J. Chem. Phys.* 1990, **92**, 5397–5403.
- (22) T. Lu and F. Chen, *J. Comput. Chem.* 2012, **33**, 580–592.
- (23) W. Zou, Z. Cai, J. Wang and K. Xin, *J. Comput. Chem.* 2018, **39**, 1697–1706.
- (24) W. Humphrey, A. Dalke and K. Schulten, *J. Mol. Graph.* 1996, **14**, 33–38.
- (XX) M. Cossi, N. Rega, G. Scalmani and V. Barone, *J. Comput. Chem.*, 2003, **24**, 669–681.
